# Supplementary material
Source: publisher figshare collection journal article supplement (https://tandf.figshare.com/articles/dataset/_/12981941)
Supplement: Supplementary file 1 [file 1]

## Supplementary Material 1

# **A new traversodontid cynodont with a peculiar postcanine dentition from the Middle/Late Triassic of Namibia and dental evolution in basal gomphodonts**

Christophe Hendrickx<sup>a</sup>, Leandro C. Gaetano<sup>b,c</sup>, Jonah N. Choiniere<sup>c</sup>, Helke Mocke<sup>d</sup>, &  
Fernando Abdala<sup>a,c</sup>

*<sup>a</sup>Unidad Ejecutora Lillo, CONICET-Fundación Miguel Lillo, Miguel Lillo 251, San Miguel de Tucumán 4000, Tucumán, Argentina; <sup>b</sup>Departamento de Ciencias Geológicas, Facultad de Ciencias Exactas y Naturales, Instituto de Estudios Andinos ‘Don Pablo Groeber’, IDEAN (Universidad de Buenos Aires, CONICET), Intendente Güiraldes 2160, Ciudad Universitaria – Pabellón II, C1428EGA, Ciudad Autónoma de Buenos Aires, Argentina; <sup>c</sup>Evolutionary Studies Institute and School of Geosciences, University of the Witwatersrand, Johannesburg, South Africa; <sup>d</sup>Geological Survey of Namibia, National Earth Science Museum, Windhoek, Namibia.*

## 1. List of cynodonts included in this study

|    | Genus                  | species               | Ex. | Specimens                                                                                                                                                                                                                                                                                             | Photo credits      | Literature                                                |
|----|------------------------|-----------------------|-----|-------------------------------------------------------------------------------------------------------------------------------------------------------------------------------------------------------------------------------------------------------------------------------------------------------|--------------------|-----------------------------------------------------------|
| 1  | <i>Thrinaxodon</i>     | <i>liorhinus</i>      | Y   | NHMUK R511, R511a, R845, R1715, R3731, R5480; BP/1/472, 1375, 1376, 4280, 5208, 5372; AMNH R9563; BSP 1934VIII 506; MCZ 8892; RC 107; TM 80, 81, 1486; NMQR 810, 811, 812, 1533; SAM-PK-K-378, 380, 381, 1121, 1388, 1461, 1467, 1468, 1483, 1498, 1499, 3592, 10016, 10017; UMCZ T.811, T.813–T.817. |                    | (Abdala <i>et al.</i> 2013; Jasinoski <i>et al.</i> 2015) |
| 2  | <i>Cynognathus</i>     | <i>crateronotus</i>   | Y   | AM 460, 2190, 3587, 4202, 5800; AMNH 5641; NHMUK R2571, R3580; BP/1/1181, 2095, 3755, 4664; BSP 1934 VIII 1, VIII 2, VIII 3, VIII 4, VIII 6; NMQR 1444; PVL 3859; SAM-PK-6224, 6235, 11264, 11484                                                                                                     |                    |                                                           |
| 3  | <i>Diademodon</i>      | <i>tetragonus</i>     | Y   | AM 3753; NHMUK R2578, 3304, 3587, 3588, 3765, BP/1/3754, 3769, 4669; BSP 1934 VIII 14, VIII 15, VIII 16, VIII 17, VIII 19; MB R1004; SAM PKK5223, K5716                                                                                                                                               | Christian Kammerer |                                                           |
| 4  | <i>Titanogomphodon</i> | <i>crassus</i>        | Y   | GSN R323                                                                                                                                                                                                                                                                                              |                    |                                                           |
| 5  | <i>Cricodon</i>        | <i>metabolus</i>      | Y   | CAMZM (UMCZ) T905; BP/1/5538, 5540, 5835, 6102, 6159; NHCC LB28                                                                                                                                                                                                                                       | Christian Sidor    | (Sidor & Hopson 2018)                                     |
| 6  | <i>Trirachodon</i>     | <i>berryi</i>         | Y   | AM 434; NHMUK R3306, R3307, R3350, R3579, R3721, R3722; BP/1/3511, 3775, 4258, 4658, 4661, 5050; BSP 1934 VIII 21, 22, 23; GSN R327; NMQR 122, 1399, 3279; SAM-PK-4801, 5873, 5881, 7888, K171; AM 461; SAM-PK-K171; SAM-PK-12168; NHMUK R3307                                                        |                    |                                                           |
| 7  | <i>Langbergia</i>      | <i>modisei</i>        | Y   | NMQR 3255, 3251, 3256, 3268, 3280, 3281; BP/1/5362, 5363, 5400, 5401, 5404; CGS/1/33 120; SAM PK 11481                                                                                                                                                                                                |                    |                                                           |
| 8  | <i>Sinognathus</i>     | <i>gracilis</i>       | Y   | IVPP V2339                                                                                                                                                                                                                                                                                            |                    |                                                           |
| 9  | <i>Beishanodon</i>     | <i>youngi</i>         | N   | PKUP V3007                                                                                                                                                                                                                                                                                            |                    | (Gao <i>et al.</i> 2010)                                  |
| 10 | Traversodontidae       | indet.                | Y   | CGS JSM 100                                                                                                                                                                                                                                                                                           |                    | (Hopson 2005)                                             |
| 11 | Traversodontidae       | indet.                | Y   | BP/1/5538                                                                                                                                                                                                                                                                                             |                    |                                                           |
| 12 | <i>Etjoia</i>          | <i>dentitransitus</i> | Y   | GSN F1591                                                                                                                                                                                                                                                                                             |                    |                                                           |
| 13 | <i>Nanogomphodon</i>   | <i>wildi</i>          | Y   | SMNS 51962                                                                                                                                                                                                                                                                                            |                    |                                                           |
| 14 | <i>Scalenodon</i>      | <i>angustifrons</i>   | Y   | CAMZM T907; CAMZM T908–918, T925, T946                                                                                                                                                                                                                                                                |                    |                                                           |
| 15 | <i>Scalenodon</i>      | <i>ribeiroae</i>      | N   | UFRGS-PV-0239-T                                                                                                                                                                                                                                                                                       |                    | (Melo <i>et al.</i> 2017)                                 |
| 16 | <i>Pascualgnathus</i>  | <i>polanskii</i>      | Y   | MLP 65-VI-18-1, 65-VI-18-2; PVL 3466; PVL 4416                                                                                                                                                                                                                                                        | Agustín Martinelli |                                                           |
| 17 | <i>Andescynodon</i>    | <i>mendozensis</i>    | Y   | PVL 3834–3836, 3840, 3890, 3891, 3892(a, b, c, d), 3894–3900, 3894-1, 3895–3900, 3903, 3907, 4069–4072, 4390, 4423–4432                                                                                                                                                                               |                    |                                                           |
| 18 | <i>Luangwa</i>         | <i>drysdalli</i>      | Y   | BP/1/3731; BP/1/3733; TSK 121                                                                                                                                                                                                                                                                         |                    |                                                           |

|    |                          |                               |   |                                                                                                                                                                                                                                                                                                                                                                                                                                             |                                                                  |
|----|--------------------------|-------------------------------|---|---------------------------------------------------------------------------------------------------------------------------------------------------------------------------------------------------------------------------------------------------------------------------------------------------------------------------------------------------------------------------------------------------------------------------------------------|------------------------------------------------------------------|
| 19 | <i>Luangwa</i>           | <i>sudamericana</i>           | Y | MCP 3167PV; UFRGS-PV 0267T                                                                                                                                                                                                                                                                                                                                                                                                                  |                                                                  |
| 20 | <i>Traversodon</i>       | <i>stahleckeri</i>            | Y | GPIT/RE/7170; GPIT 1045, 1063, 1069; UFRGS-PV 0224T                                                                                                                                                                                                                                                                                                                                                                                         |                                                                  |
| 21 | <i>Mandagomphodon</i>    | <i>hirschsoni</i>             | Y | NHMUK R8577                                                                                                                                                                                                                                                                                                                                                                                                                                 | (Hopson 2014)                                                    |
| 22 | <i>Mandagomphodon</i>    | <i>atridgei</i>               | Y | NHMUK R8578; CAMZM T922                                                                                                                                                                                                                                                                                                                                                                                                                     |                                                                  |
| 23 | <i>Dadadon</i>           | <i>isaloi</i>                 | Y | UA 10606; UA 10605                                                                                                                                                                                                                                                                                                                                                                                                                          | (Ranivoharimana <i>et al.</i> 2011; Kammerer <i>et al.</i> 2012) |
| 24 | <i>Santacruzodon</i>     | <i>hopsoni</i>                | Y | MCN PV 2768; MCN PV 2751, MCN PV 2752, MCN PV 2770 ; MCP 4044 PV, MCP 4034 PV                                                                                                                                                                                                                                                                                                                                                               |                                                                  |
| 25 | <i>Massetognathus</i>    | <i>pascuali</i>               | Y | PULR 10; PULR 13 Rafael Delcourt (former MLP No. 65-XI-14-2); PULR 11 (former MLP No. 65-XI-14-15); PULR unnumbered (former MLP No. 65-XI-14-16); PVL 3901–3906, 4014, 4016, 4168, 4439–4443, 4613, 4614, 4676, 4726–4729, 5441, 5443–5445, 5683; MCZ 3691, 3786, 3798, 3801, 3804, 3806, 3807, 4021, 4138, 4208, 4215, 4216, 4258, 4265; NHMUK R8430; BP/1/4245; MCP 3284                                                                  |                                                                  |
| 26 | <i>Massetognathus</i>    | <i>ochagaviae</i>             | Y | MCP 3871 PV; UFRGS-PV 0255T; UFRGS-PV 0070T, 0071T, 0125T, 0239T, 0241T, 0242T, 0243T, 0245T, 0265T, 0273T, 0397T, 1064T; AMNH FARB 7802, 7803, 21400–21410                                                                                                                                                                                                                                                                                 |                                                                  |
| 27 | <i>Boreogomphodon</i>    | <i>jeffersoni</i>             | Y | USNM 437632; CM 20050, 76800, 76801, 76803; USNM 437635, 437636, 448562, 448570, 448593, 448599, 448632, 448633; VMNH 3575, 3578; CM 76805, 76807, 76808, 76810, 76812, 76815, 76818; USNM 448563–448569, 448571–448573, 448575, 448576, 448578, 448597, 448601, 448625, 448629; USNM 448598, 448602; VMNH 3577; NCSM 11466, 15295, 16292, 16297, 16358, 16364, 18300, 19587, 20660, 20662, 20692, 20698, 20700, 20704, 20712, 21370, 21371 | (Liu & Sues 2010; Sues & Hopson 2010)                            |
| 28 | <i>Plinthogomphodon</i>  | <i>herpetairus</i>            | N | UNC 15576; UNC 15656                                                                                                                                                                                                                                                                                                                                                                                                                        | (Sues <i>et al.</i> 1999)                                        |
| 29 | <i>Arctotraversodon</i>  | <i>plemmyridon</i>            | Y | YPM-PU 19190; YPM-PU 19190-A; YPM-PU 21693; NSM 983GF2.1; NSM 990GF89.1; YPM-PU 22343                                                                                                                                                                                                                                                                                                                                                       |                                                                  |
| 30 | <i>Gomphodontosuchus</i> | <i>brasiliensis</i>           | Y | GPIT/RE/09397                                                                                                                                                                                                                                                                                                                                                                                                                               |                                                                  |
| 31 | <i>Menadon</i>           | <i>besairiei</i> (Madagascar) | Y | UA 10601; FMNH PR 2104; FMNH PR 2444                                                                                                                                                                                                                                                                                                                                                                                                        |                                                                  |
| 32 | <i>Menadon</i>           | <i>besairiei</i> (Brazil)     | Y | UFRGS-PV-0269-T, 0434-T, 0891-T, 0903-T, 0905-T, 1054-T, 1164-T, 1165-T; MCN-                                                                                                                                                                                                                                                                                                                                                               | (Melo <i>et al.</i> 2015)                                        |

|    |                         |                      |   |                                                                                                                                                                   |                                                          |
|----|-------------------------|----------------------|---|-------------------------------------------------------------------------------------------------------------------------------------------------------------------|----------------------------------------------------------|
| 33 | <i>Protuberum</i>       | <i>cabralense</i>    | N | PV 0505, 2750<br>MGB 368-100; UFRGS-PV 0981T; UFRGS-PV 0983T; UFRGS-PV 0985T; UFRGS-PV 0986T; UFRGS-PV 1009T; UFRGS-PV 1010T; UFRGS-PV 1011T                      | Tomaz Melo                                               |
| 34 | <i>Ruberodon</i>        | <i>roychowdhurii</i> | N | IITKGPR381, 375, 376, 378, 380                                                                                                                                    | (Ray 2015)                                               |
| 35 | <i>Scalenodontoides</i> | <i>macrodontes</i>   | Y | MNHN 1957-23; SAM-PK-K336; BP/1/5395; MNHN 1955-25; NMQR 3053                                                                                                     |                                                          |
| 36 | <i>Exaeretodon</i>      | <i>argentinus</i>    | Y | MLP 43-VII-14-2; MLP 43-VII-14-1, 43-VII-14-3, 43-VII-14-4; MACN 18063, 18114, 18125; PVL 2564; MCZ 7047; MCZ 3779, 4493, 111-64A, 377-58 M; MCP 1522PV; PVSJ 157 |                                                          |
| 37 | <i>Exaeretodon</i>      | <i>riograndensis</i> | Y | MCP 1522PV; MCP 2361 PV; MCP 3843 PV; UFRGS-PV 0715T                                                                                                              |                                                          |
| 38 | <i>Siriusgnathus</i>    | <i>niemeyerorum</i>  | N | CAPPA/UFSM 0032, 0109, 0124, 0125, 0260                                                                                                                           | (Pavanatto <i>et al.</i> 2018; Miron <i>et al.</i> 2020) |
| 39 | <i>Habayia</i>          | <i>halbardieri</i>   | Y | IRSNB R203                                                                                                                                                        |                                                          |
| 40 | <i>Maubeugia</i>        | <i>lotharingica</i>  | Y | IRSNB R172                                                                                                                                                        |                                                          |
| 41 | <i>Rosieria</i>         | <i>delsatei</i>      | Y | IRSNB R173, R174                                                                                                                                                  |                                                          |
| 42 | <i>Microscalenodon</i>  | <i>nanus</i>         | Y | IRSNB R405, R406                                                                                                                                                  |                                                          |

Abbreviations: Ex., Examined; N, No; Y, Yes. The list of institutional abbreviations is listed below.

## List of institutional abbreviations

**AM:** Albany Museum, Grahamstown, South Africa; **AMNH:** American Museum of Natural History, New York, New York, USA; **BP:** Evolutionary Studies Institute (formerly Bernard Price Institute for Palaeontological Research), University of the Witwatersrand, Johannesburg, South Africa; **BSP:** Bayerische Staatssammlung für Paläontologie und Geologie, Munich, Germany; **CAMZM:** University Museum of Zoology, Cambridge, UK; **CAPPA/UFSM:** Centro de Apoio à Pesquisa Paleontológica, Universidade Federal de Santa Maria, São João do Polêsine, Brazil; **CGS:** Council for Geosciences, Pretoria, South Africa; **CM:** Carnegie Museum of Natural History, Pittsburgh, Pennsylvania, USA; **FMNH:** Field Museum of Natural History, Chicago, Illinois, USA; **GPIT:** Institut und Museum für Geologie und Paläontologie der Universität Tübingen, Tübingen, Germany; **GSN:** Geological Survey of Namibia, Windhoek, Namibia; **IITKGPR:** Indian Institute of Technology Kharagpur, Kharagpur, India; **IRSNB:** Royal Belgian Institute of Natural Sciences, Brussels, Belgium; **IVPP:** Institute for Vertebrate Paleontology and Paleoanthropology, Beijing, China; **MACN:** Museo Argentino de Ciencias Naturales “Bernardino Rivadavia”, Buenos Aires, Argentina; **MB:** Museum für Naturkunde, Berlin, Germany; **MCN:** Museu de Ciências Naturais, Fundação Zoobotânica do Rio Grande do Sul, Porto Alegre, Brazil; **MCP:** Laboratório de Paleontologia, Museu de Ciências e Tecnologia, Pontifícia Universidade Católica do Rio Grande do Sul, Porto Alegre, Brazil; **MCZ:** Museum of Comparative Zoology, Harvard University, Cambridge, MA, USA; **MGB:** Museu Guido Borgomanero, Mata, Brazil; **MHNSR–Pv:** Museo de Historia Natural de San Rafael, Mendoza, Argentina; **MLP:** Museo de La Plata, La Plata, Argentina; **MNHN:** Muséum National d’Histoire Naturelle, Paris, France; **NCSM:** North Carolina Museum of Natural Sciences, Raleigh, North Carolina, USA; **NHCC:** National Heritage Conservation Commission, Lusaka, Zambia; **NHMUK PV:** Natural History Museum, London, UK; **NMQR:** National Museum, Bloemfontein, South Africa; **NMT:** National Museum of Tanzania, Dar es Salaam, Tanzania; **PKUP:** Peking University Paleontological Collections, Beijing; **PULR:** Museo de Antropología, Universidad Nacional de La Rioja, La Rioja, Argentina; **PVL:** Colección de Palaeontología de Vertebrados, Instituto Miguel Lillo, Universidad Nacional de Tucumán, Argentina; **PVSJ:** Museo de Ciencias Naturales, Universidad Nacional de San Juan, San Juan, Argentina; **RC:** Rubidge Collection, Wellwood, Graaff Reinet, South Africa; **SAM-PK:** Iziko, the South African Museum, Cape Town, South Africa; **SMNS:** Staatliches Museum für Naturkunde Stuttgart, Stuttgart, Germany; **TM:** Ditsong National Museum of Natural History, Pretoria (formerly Transvaal Museum), South Africa; **UA:** Université d’Antananarivo, Antananarivo, Madagascar; **UFRGS-PV:** Setor de Paleovertebrados, Instituto de Geociências, Universidade Federal do Rio Grande do Sul, Porto Alegre, Brazil; **UMZC:** University Museum of Zoology, Cambridge, UK; **UNC:** Collections of the Department of Geology, University of North Carolina, Chapel Hill, USA; **USNM:** National Museum of Natural History, Washington D.C., USA; **VMNH:** Virginia Museum of Natural History, Martinsville, Virginia, USA; **YPM-PU:** former Princeton University collection, now housed in the Peabody Museum of Natural History, Yale University, New Haven, Connecticut, USA.

## 2. Character list of our dataset

### I. INCISORS

#### *Generality*

- 1) Incisors, cross-section of mesialmost incisor at mid-crown (**New**):
  - (0) salinon or D-shaped
  - (1) subcircular, ovoid, lanceolate or thick lenticular
  - (2) parlinon-shaped or narrow lenticular
- 2) Incisors, constriction at the crown base in some teeth (**New**; ORDERED):
  - (0) absent
  - (1) present, weak
  - (2) present, important (= folioid teeth)
- 3) Incisors, denticles (Gaetano and Abdala, 2015; #39):
  - (0) present and small, more than 20 mesial/distal denticles along the crown height
  - (1) present and large, less than 20 mesial/distal denticles along the crown height
  - absent
- 4) Incisors, denticles (**New**):
  - (0) present on the mesial and distal carinae
  - (1) present on the distal carina only
- 5) Incisors, denticle orientation (**New**):
  - (0) perpendicular to carina
  - (1) diagonally oriented
- 6) Incisors, numerous longitudinal ridges on labial surface in some teeth (**New**):
  - (0) absent
  - (1) present

#### *Upper incisors*

- 7) Upper incisors, crown base length (CBL) in adults (Gaetano & Abdala, 2015; #40):
  - (0) small, CBL shorter than that of canines
  - (1) enlarged, CBL of incisors as long or longer than that of canines
- 8) Upper incisors, number (Gaetano & Abdala, 2015; #36; ORDERED):
  - (0) two
  - (1) three
  - (2) four
  - (3) five
- 9) Upper incisors, procumbency (Gaetano & Abdala, 2015; #38):
  - (0) absent or very light
  - (1) present, strongly procumbent teeth
  - (2) present, only first incisor procumbent
- 10) Upper incisors, diastema before upper canines (Gaetano & Abdala, 2015; #26):
  - (0) present, longer than the last upper incisor CBL
  - (1) absent or short, shorter than the last upper incisor CBL

### ***Lower incisors***

- 11) Lower incisors, CBL in adults (Gaetano & Abdala, 2015; #40):
- (0) small, CBL shorter than that of canines
  - (1) enlarged, CBL of incisors as long or longer than that of canines
- 12) Lower incisors, number (Gaetano & Abdala, 2015; #37):
- (0) two
  - (1) three
  - (2) four
- 13) Lower incisors, procumbency (**New**):
- (0) present
  - (1) absent or very light

## **II. CANINES**

### ***Generality***

- 14) Canines, denticles (Gaetano & Abdala, 2015; #43):
- (0) present, more than 15 denticles per 5 mm along the distal carina
  - (1) present, 15 or less denticles per 5 mm along the distal carina
  - (2) absent
- 15) Canines, denticle size along the carina (**New**):
- (0) regular, gradual change in denticle size
  - (1) irregular, sporadic change in denticle size
- 16) Canines, mesial denticles significantly larger than distal denticles (DSDI>1.2) in adults (**New**):
- (0) absent
  - (1) present
- 17) Canine, longitudinal ridges on some crowns (**New**):
- (0) absent
  - (1) present, poorly defined ridges
  - (2) present, well-delimited ridges
- 18) Canine, transverse undulations in adults (**New**):
- (0) present
  - (1) absent

### ***Upper canine***

- 19) Upper canines, position in relation to paracanine fossa (Gaetano & Abdala, 2015; #25; ORDERED):
- (0) labiodistal
  - (1) labial
  - (2) labiomesial
- 20) Upper canines, diastema before upper postcanines in adults (Gaetano & Abdala, 2015; #27; ORDERED):
- (0) short, less than the mesiodistal length of the upper canine alveoli

- (1) medium, more than the mesiodistal length of the upper canine alveoli but less than twice this length
  - (2) long, more than twice the mesiodistal length of the upper canine alveoli
- 21) Upper canines, size in adult (Gaetano & Abdala, 2015; #41):
- (0) large, upper canine height more than twice the upper incisor height
  - (1) reduced in size, upper canine height less than twice upper incisor's height
  - (2) upper canine absent

### ***Lower canine***

- 22) Lower canines, diastema before lower postcanines in adults (Gaetano & Abdala, 2015; #28):
- (0) long, longer than the lower canine CBL
  - (1) absent or short, shorter than the lower canine CBL
- 23) Lower canines, size (Gaetano & Abdala, 2015; #42):
- (0) large, lower canine height more than twice the lower incisor height
  - (1) reduced in size, lower canine height less than twice the lower incisor height
  - (2) lower canine absent
- 24) Lower canines, procumbency (**New**):
- (0) absent, crown apex projecting dorsally
  - (1) present, crown apex projecting mesiodorsally

### ***Paracanine fossa***

- 25) Paracanine fossa in cranium (**New**):
- (0) deep and well delimited
  - (1) shallow and poorly delimited
- 26) Paracanine fossa in cranium (**New**):
- (0) mesiodistally longer than mesiodistal length of upper canine alveoli
  - (1) same mesiodistal length or shorter than mesiodistal length of upper canine alveoli

## **III. UPPER POSTCANINES**

### ***Generality***

- 27) Upper postcanines, number (**New**):
- (0) 11 or less
  - (1) more than 11
- 28) Upper postcanines, variation in the number of teeth during ontogeny (**New**):
- (0) number of teeth remaining stable during ontogeny
  - (1) number of teeth increasing during growth
  - (2) number of teeth decreasing during growth
- 29) Upper/lower postcanines, formed by (**New**; ORDERED):
- (0) sectorial only
  - (1) conical (more than two conical postcanines), gomphodont and sectorial
  - (2) conical (less than three conical postcanines), gomphodont and sectorial
  - (3) gomphodont only (Gaetano & Abdala, 2015; #44)
- 30) Upper postcanines, long axis of mid-gomphodont teeth (**New**):

- (0) roughly perpendicular to the long axis of the cranial tooth row
  - (1) diagonally and labiodistally (or linguomesially) oriented from the long axis of the cranial tooth row
  - (2) diagonally and labiomesially (or linguodistally) oriented from the long axis of the cranial tooth row
  - (3) parallel to the long axis of the cranial tooth row
- 31) Upper postcanines, number of subcircular alveoli/crowns with a subcircular cross-section in the mesial portion of the tooth row (**New**; ORDERED):
- (0) more than two
  - (1) one or two
  - (2) absent
- 32) Upper postcanines, one or several sectorial teeth in the mesial portion of the tooth row (**New**):
- (0) present
  - (1) absent
- 33) Upper postcanines, overall morphology of gomphodont teeth in occlusal view (Gaetano & Abdala, 2015; #45):
- (0) ovoid-ellipsoid
  - (1) nearly rectangular
  - (2) nearly triangular
  - (3) nearly quadrangular or polygonal
- 34) Upper postcanines, elongation ratio (labiolingual length/mesiodistal width) of widest upper gomphodont postcanine (**New**; ORDERED):
- (0) <1.4
  - (1) 1.4-1.8
  - (2) >1.8
- 35) Upper postcanines, distal inclination of the last gomphodont teeth in relation to the axis of the skull (Gaetano & Abdala, 2015; #30):
- (0) absent or weak
  - (1) oblique
- 36) Upper postcanines, imbrication (different of shouldering) of the mesial margin in mesial gomphodont postcanines (Gaetano & Abdala, 2015; #48; ORDERED):
- (0) absent
  - (1) slightly developed, only the mesiocentral part of the crown is imbricated
  - (2) well-developed, most of the crown mesial margin is imbricated (shouldering)
- 37) Upper postcanines, imbrication (different of shouldering) of the mesial margin in distal gomphodont postcanines (Gaetano & Abdala, 2015; #48; ORDERED):
- (0) absent
  - (1) slightly developed, only the mesiocentral part of the crown is imbricated
  - (2) well-developed, most of the crown mesial margin is imbricated (shouldering)
- 38) Upper postcanines, strong lingual inclination of labial margin of gomphodont teeth (**New**):
- (0) absent, labial surface straight or only weakly inclined lingually
  - (1) present, labial margin strongly inclined lingually

- 39) Upper postcanines, transverse symmetry of the labial and lingual halves of largest gomphodont teeth (**New**):
- (0) sub-symmetrical, the labial and lingual halves of the crown have the same mesiodistal length
  - (1) asymmetrical, the lingual half of the crown is significantly mesiodistally longer than the labial half
  - (2) asymmetrical, the labial half of the crown is significantly mesiodistally longer than the lingual half
- 40) Upper postcanines, apicobasal groove(s) on the labial surface of some gomphodont teeth (**New**):
- (0) absent
  - (1) present, no more than a single groove
  - (2) present, two grooves
- 41) Upper postcanines, apicobasal groove(s) on the labial surface of some gomphodont teeth (**New**):
- (0) distal to labial cusp
  - (1) mesial to labial cusp
  - (2) mesial and distal to labial cusp

### ***Extension***

- 42) Upper postcanines, extension in labial view (**New**; ORDERED):
- (0) anterior to orbit
  - (1) below anterior half of orbit
  - (2) below posterior part of orbit or posterior to orbit
- 43) Upper postcanines, extension of distalmost margin of tooth relative to anteriormost margin of the subtemporal fossa in palatal view (Gaetano & Abdala, 2015; #32; ORDERED):
- (0) anterior
  - (1) at the same level
  - (2) posterior
- 44) Long axis of distal part of upper postcanine row in palatal view (Gaetano & Abdala, 2015; #31; ORDERED):
- (0) directed towards the lateral part of the subtemporal fossa
  - (1) directed towards the center of the subtemporal fossa
  - (2) directed towards the medial part of the subtemporal fossa

### ***Transverse crest***

- 45) Position of transverse crest on upper gomphodont postcanines (Gaetano & Abdala, 2015; #54; ORDERED):
- (0) on the mesial half of crown
  - (1) on the central part of crown
  - (2) on the distal half of the crown
- 46) Transverse crest in upper gomphodont postcanines (**New**):
- (0) low ridge
  - (1) high crest

47) Transverse crest, morphology in upper gomphodont postcanines (**New**):

- (0) smooth ridge
- (1) showing some serrated portions
- (2) bearing one or several distinct central accessory cusps (cuspidated)

48) Transverse crest, one or several accessory ridges on the mesial/distal surface of the crest in some upper gomphodont postcanines (**New**):

- (0) present
- (1) absent

49) Transverse crest, deep valleys between labial and central/lingual cusp in upper gomphodont postcanines (**New**):

- (0) absent
- (1) present, basal extension at the same level or close to the level of occlusal basins, well-separated cusps
- (2) present, basal extension significantly higher than the occlusal basins

50) Transverse crest, deep labial valley between labial and central/lingual cusp in upper gomphodont postcanines (**New**):

- (0) labiolingually narrow, less than one-third of the labiolingual length of crown
- (1) labiolingually wide, more than one-third of the labiolingual length of crown

### ***Cusp***

51) Widest cusp labiolingually in transverse crest of unworn upper gomphodont postcanines (**New**):

- (0) central
- (1) labial
- (2) lingual

52) Height of the labial and lingual cusps in unworn upper gomphodont postcanines (**New**; ORDERED):

- (0) labial higher than lingual
- (1) labial as high as lingual
- (2) labial lower than lingual

53) Number of cusps in the transverse crest of unworn upper gomphodont postcanines (Gaetano & Abdala, 2015; #50):

- (0) three or more
- (1) two, central cusp merged with lingual cusp

54) Central cusp of transverse crest in upper gomphodont postcanines (Gaetano & Abdala, 2015; #51):

- (0) midway between labial and lingual cusps
- (1) closer to lingual cusp

55) Labial cusp, strong labial displacement from the rest of the crown in some upper gomphodont postcanines in apical view (Gaetano & Abdala, 2015; #49):

- (0) absent or weak, labial surface of crown roughly convex
- (1) present, labiomesial part of crown strongly protruding labially and subtriangular in apical view

56) Labiomesial accessory cusp on unworn upper postcanines (Gaetano & Abdala, 2015; #52):

- (0) absent
- (1) one
- (2) two or more

57) Labiomesial accessory cusp on unworn upper postcanines (**New**):

- (0) small, significantly smaller than main labial and lingual cusp
- (1) large, as wide or almost as wide as main labial cusp

58) Labiodistal accessory cusp on unworn upper postcanines (Gaetano & Abdala, 2015; #53):

- (0) present
- (1) absent

59) Linguomesial accessory cusp on unworn upper postcanines (Gaetano & Abdala, 2015; #55):

- (0) absent
- (1) present

***Cingulum/ridge***

60) Mesial cingulum/ridge on unworn upper gomphodont postcanines (Gaetano & Abdala, 2015; #56):

- (0) present, bearing distinct cuspules (cuspidated)
- (1) present, no cuspules
- (2) absent

61) Mesial cingulum/ridge on unworn upper gomphodont postcanines (Gaetano & Abdala, 2015; #57):

- (0) low ridge
- (1) high and well-developed crest

62) Distal cingulum/ridge on unworn upper gomphodont postcanines (Gaetano & Abdala, 2015; #47):

- (0) present, bearing distinct cuspules (cuspidated)
- (1) present, serrated
- (2) present, smooth ridge
- (3) absent

63) Labial cingulum on mesial portion of upper gomphodont postcanines, labial to the labial cusp (Gaetano & Abdala, 2015; #46):

- (0) absent
- (1) present, serrated
- (2) present, smooth ridge

64) Lingual ridge on upper gomphodont postcanines (Gaetano & Abdala, 2015; #58):

- (0) absent
- (1) present, low
- (2) present, high

65) Central ridge mesial and parallel to transverse crest on some upper gomphodont postcanines (**New**):

- (0) absent
- (1) present

## ***Basin***

66) Mesial basin on upper gomphodont postcanines (**New**):

- (0) present, mesiodistally narrow, forming a labiodistally extended groove
- (1) present, mesiodistally wide surface
- (2) absent

67) Mesial basin on upper gomphodont postcanines (**New**):

- (0) sloping towards the mesial side of the crown
- (1) converging towards the labiomesial side of the crown, deepest portion of the mesial basin situated labiomesially
- (2) converging towards the linguomesial side of the crown, deepest portion of the mesial basin situated linguomesially

68) Distal basin on upper gomphodont postcanines (**New**):

- (0) present
- (1) absent

## **V. LOWER POSTCANINES**

69) Lower postcanines, number (**New**):

- (0) 11 or more
- (1) less than 11

70) Lower postcanines, covering by coronoid process of the mandible in labial/lingual view (Gaetano & Abdala, 2015; #33):

- (0) coronoid process covers entirely the distalmost postcanine
- (1) coronoid process does not cover entirely the distalmost postcanine

71) Lower postcanines, overall morphology of gomphodont teeth in occlusal view (Gaetano & Abdala, 2015; #59):

- (0) circular
- (1) ovoid-ellipsoid
- (2) quadrangular or subrectangular
- (3) subtriangular

72) Lower postcanines, elongation ratio (labiolingual length/mesiodistal width) of most labiolingually elongated lower gomphodont postcanine (**New**; ORDERED):

- (0) >1.5
- (1) 1.1-1.5
- (2) <1.1

73) Lower postcanines, long axis of gomphodont tooth in apical view (**New**):

- (0) perpendicular to the long axis of the mandibular tooth row
- (1) strongly diagonally oriented from the long axis of the mandibular tooth row
- (2) parallel to the long axis of the mandibular tooth row

74) Lower postcanines, distal inclination of mesial teeth from the main axis of the alveolar margin in labial view (**New**):

- (0) absent, tooth nearly vertical
- (1) present, slightly inclined distally
- (2) present, strongly inclined distally

75) Lower postcanines, labiolingual constriction in the transversal plane of distal gomphodont teeth at mid-crown in apical view (**New**):

- (0) absent
- (1) weak
- (2) important

***Crest***

76) Transverse crest in lower gomphodont postcanines (Gaetano & Abdala, 2015; #60):

- (0) central
- (1) mesial

77) Transverse crest in lower gomphodont postcanines, valley between labial and central/lingual cusps (**New**):

- (0) absent or shallow
- (1) present and deep

78) Labial ridge/crest in unworn lower gomphodont postcanines (**New**):

- (0) absent
- (1) present, smooth ridge
- (2) present, crenulated crest/cingulum

***Cusp***

79) Number of cusps in the transverse crest of the unworn lower gomphodont postcanines (Gaetano & Abdala, 2015; #61):

- (0) two
- (1) three or more

80) Central cusp of transverse crest in lower gomphodont postcanines (**New**):

- (0) midway between labial and lingual cusps
- (1) closer to lingual cusp
- (2) closer to labial cusp

81) Height of the labial and lingual cusps in the lower gomphodont postcanines (Gaetano & Abdala, 2015; #64):

- (0) labial lower than lingual
- (1) labial as high as lingual
- (2) labial higher than lingual

82) Widest cusp labiolingually in transverse crest of unworn lower gomphodont postcanines (Gaetano & Abdala, 2015; #65):

- (0) lingual
- (1) labial
- (2) central
- (3) lingual and labial of same size

83) Lower postcanines, strong distal inclination of lingual cusp from labial cusp in distalmost gomphodont teeth in lingual view (Gaetano & Abdala, 2015; #66):

- (0) absent, main axis of lingual and labial cusps subparallel
- (1) present, lingual cusp strongly distally inclined from labial cusp

84) Labiomesial accessory cusp on unworn lower gomphodont postcanines (**New**):

- (0) present
- (1) absent

85) Linguomesial accessory cusp on unworn lower gomphodont postcanines (**New**):

- (0) present
- (1) absent

86) Labiodistal accessory cusp on unworn lower gomphodont postcanines (**New**):

- (0) present
- (1) absent

87) Linguodistal accessory cusp on unworn lower gomphodont postcanines (**New**):

- (0) present
- (1) absent

### ***Cingulum***

88) Mesial cingulum in unworn lower gomphodont postcanines (Gaetano & Abdala, 2015; #62):

- (0) disposed along the entire mesial margin of the crown
- (1) reduced, cingulum centrally or labially positioned on the mesial margin of the crown
- (2) absent

89) Mesial cingulum in unworn lower gomphodont postcanines (**New**):

- (0) separated from the transverse crest by a mesial basin
- (1) directly adjacent to transverse crest

90) Distal cingulum/ridge on unworn lower gomphodont postcanines (Gaetano & Abdala, 2015; #63):

- (0) present, serrated or bearing distinct cuspules (cuspidated)
- (1) present, smooth ridge
- (2) absent

91) Distal cingulum/ridge on unworn lower gomphodont postcanines (**New**):

- (0) low ridge
- (1) high crest

### **IV. SECTORIAL POSTCANINES**

92) Upper/Lower sectorial postcanines (intermediate postcanine included), number (**New**):

- (0) more than 3
- (1) two or three
- (2) one

93) Sectorial postcanines, intermediate gomphodont/sectorial tooth (**New**):

- (0) absent
- (1) present

94) Sectorial postcanines, elongation axis of upper teeth (**New**):

- (0) roughly parallel to the labial margin of the cranium or aligned with the main axis of the upper tooth row
- (1) strongly diagonally and mesiolingually oriented from the labial margin of the cranium and the main axis of the upper tooth row

- 95) Sectorial postcanines, main cusp in most teeth (**New**):
- (0) strongly distally recurved, tip pointing almost distally, extending above the distal main cusp
  - (1) poorly distally recurved, tip pointing slightly apicodistally and not extending above the distal main cusp
  - (2) straight
- 96) Sectorial postcanines, main cusp in most teeth (**New**):
- (0) large, occupies more than half the sectorial crown length
  - (1) medium-sized, occupies one half of sectorial crown length
  - (2) small, occupies less than a half of sectorial crown length
- 97) Sectorial postcanines, mesial main cusp in some teeth (**New**):
- (0) present
  - (1) absent
- 98) Sectorial postcanines, mesial main cusp in most teeth (**New**):
- (0) large, strongly protruding from sectorial crown
  - (1) reduced in size, but not forming a crenulated ridge
  - (2) reduced in size, and forming a crenulated ridge with the mesial accessory cusps of similar size
- 99) Sectorial postcanines, highest number of mesial accessory cusp(s) mesial to the mesial main cusp (**New**):
- (0) present, more than one mesial accessory cusps
  - (1) present, a single mesial accessory cusp
  - (2) absent
- 100) Sectorial postcanines, distal main cusp in at least some teeth (**New**):
- (0) present
  - (1) absent
  - (3) absent
- 101) Sectorial postcanines, highest number of distal accessory cusp(s) distal to the mesial main cusp (**New**):
- (0) present, more than one distal accessory cusps
  - (1) present, a single distal accessory cusp
  - (2) absent
- 102) Sectorial postcanines, distal accessory cusp in most teeth (**New**):
- (0) large, strongly protruding from sectorial crown
  - (1) reduced in size, but not forming a crenulated ridge
  - (2) reduced in size, and forming a crenulated ridge with the mesial accessory cusps of similar size
- 103) Sectorial postcanines, serrations on the mesial carina in some teeth (**New**):
- (0) present on most of the crown height
  - (1) present on the apical part of the crown
  - (2) absent
- 104) Sectorial postcanines, shape of mesial denticles (**New**):
- (0) convex

- (1) biserrated, with a small basal denticle and a larger distal denticle
- 105) Sectorial postcanines, cingulum/cingular cusps in some teeth (**New**):
  - (0) absent
  - (1) present lingually
  - (2) present labially
  - (3) present both lingually and labially
- 106) Sectorial postcanines, labial cingulum in some upper postcanines (**New**):
  - (0) well-developed multicuspid cingulum forming a collar
  - (1) non-cuspidate ridge not forming a collar
  - (2) one or two cingular cusps
- 107) Sectorial postcanines, lingual cingulum in some lower postcanines (**New**):
  - (0) well-developed multicuspid cingulum forming a collar
  - (1) poorly developed multicuspid cingulum not forming a collar
  - (2) one or two cingular cusps

## VI. OCCLUSION

- 108) Postcanine occlusion (Gaetano & Abdala, 2015; #34):
  - (0) absent
  - (1) present
- 109) Deep occlusal basins in the postcanines (Gaetano & Abdala, 2015; #67):
  - (0) absent
  - (1) present
- 110) Shearing planes between the outer surface of the main cusp of the lower and the inner surfaces of the main cusps of the upper postcanines (Gaetano & Abdala, 2015; #35):
  - (0) present
  - (1) absent

## VII. TEXTURE

- 111) Braided and oriented enamel surface texture in some incisors/canines (**New**):
  - (0) absent, enamel texture of all incisors/canines smooth or irregular and non-oriented
  - (1) present
- 112) braided and oriented enamel surface texture in some postcanines (**New**):
  - (0) absent, enamel texture of all postcanines smooth or irregular and non-oriented
  - (1) present

## VIII. ROOT

- 113) Lower postcanines, horizontal labiolingual constriction between crown and root in mesial/distal view (**New**):
  - (0) absent or weak, crown and root (almost) confluent
  - (1) important, strong constriction between crown and root
- 114) Postcanine root, length (**New**):
  - (0) long, more than twice the largest crown height
  - (1) short, less than twice the crown height

## IX. NON-DENTAL CRANIAL CHARACTERS

115) Adult maximum skull size (Gaetano & Abdala, 2015; #1):

- (0) large (greater than 25 cm)
- (1) medium to small

116) Snout (preorbit) in adults in relation to temporal region (Gaetano & Abdala, 2015; #2):

- (0) longer
- (1) subequal
- (2) shorter

117) Two side of temporal fenestra (outline of zygoma) (Gaetano & Abdala, 2015; #3):

- (0) divergent posteriorly
- (1) nearly parallel
- (2) bulge in the middle

118) Extranasal process of the premaxilla (**New**):

- (0) small
- (1) large but not contacting the nasal

119) Septomaxilla facial process (**New**):

- (0) long
- (1) short

120) Carotid artery foramina in basisphenoid (**New**):

- (0) present
- (1) absent

121) Mandibular symphysis (**New**):

- (0) unfused
- (1) fused

122) Zygomatic arch dorsoventral height (**New**):

- (0) moderately deep
- (1) very deep

123) Inferior margin of jugal in the zygoma (**New**):

- (0) low
- (1) high

124) Premaxilla forms posterior border incisive foramen (Gaetano & Abdala, 2015; #4):

- (0) absent
- (1) present

125) Vomer exposure in incisive foramen (at anterior ends of maxillae on palate) (Gaetano & Abdala, 2015; #5):

- (0) present
- (1) absent

126) Vomer vertical septum extending posteriorly beyond level of secondary palate (Gaetano & Abdala, 2015; #6):

- (0) present
- (1) absent

- 127) Internarial bar (Gaetano & Abdala, 2015; #7):  
(0) present  
(1) absent
- 128) Parietal foramen in adults (Gaetano & Abdala, 2015; #8):  
(0) present  
(1) absent
- 129) Ectopterygoid (Gaetano & Abdala, 2015; #9):  
(0) present  
(1) absent
- 130) Posterior extension of secondary palate relative to anterior border of orbit (Gaetano & Abdala, 2015; #10, Modified):  
(0) anterior  
(1) subequal  
(2) posterior
- 131) Posterior extension of the jugal dorsally above the squamosal in the zygomatic arch (Gaetano & Abdala, 2015; #11):  
(0) absent or with small extension  
(1) well developed
- 132) Position of anterior root of the zygomatic arch relative to the ventral margin of the maxilla (Gaetano & Abdala, 2015; #12):  
(0) nearly at same level or slightly higher  
(1) remarkably higher
- 133) Zygomatic process of the jugal (Gaetano & Abdala, 2015; #13):  
(0) little projected  
(1) conspicuously projected  
(2) absent  
(3) a ball-like process
- 134) Diameter of suborbital bar below center of orbit (anterior to suborbital process, where present) (Gaetano & Abdala, 2015; #14):  
(0) greater than 1/2 diameter of bar below posterior part of orbit (posterior to suborbital process)  
(1) less than 1/2 diameter of bar below posterior part of orbit
- 135) Maxilla in the margin of the subtemporal fenestra (Gaetano & Abdala, 2015; #15):  
(0) excluded  
(1) included
- 136) Epipterygoid-quadrate contact (Gaetano & Abdala, 2015; #16):  
(0) present  
(1) absent
- 137) Frontal-epipterygoid contact (Gaetano & Abdala, 2015; #17):  
(0) present  
(1) absent
- 138) Palatine (Gaetano & Abdala, 2015; #18):

- (0) does not meet frontal
  - (1) meets frontal but neither element contributes significantly to medial orbit wall
- 139) Notch separating lambdoidal crest from zygomatic arch (Gaetano & Abdala, 2015; #19):
- (0) shallow
  - (1) deep v-shaped
- 140) Lower jaw symphysis as a chin-like process in adults (Gaetano & Abdala, 2015; #20):
- (0) absent or little developed
  - (1) well-developed
- 141) Dentary with sigmoid ventral curvature (Gaetano & Abdala, 2015; #21):
- (0) absent
  - (1) present
- 142) Dentary angular process (Gaetano & Abdala, 2015; #22):
- (0) not or very weakly projected posteriorly
  - (1) projected posteriorly as distinct process
- 143) Elongated mental foramen below postcanine tooth row and above coronoid ridge (Gaetano & Abdala, 2015; #23):
- (0) absent
  - (1) present
- 144) Coronoid ridge anterior to masseteric fossa (Gaetano & Abdala, 2015; #24):
- (0) absent to low
  - (1) very strong, outturned
- 145) Maxillary labial platform lateral to the postcanine series (Gaetano & Abdala, 2015; #29):
- (0) absent
  - (1) present

#### X POSTCRANIAL CHARACTERS

- 146) Anapophysis (Gaetano & Abdala, 2015; #68):
- (0) absent
  - (1) present
- 147) Expanded costal plates on ribs (Gaetano & Abdala, 2015; #69):
- (0) present
  - (1) absent
- 148) Lumbar costal plates with ridge overlapping preceding rib (Gaetano & Abdala, 2015; #70):
- (0) present
  - (1) absent
- 149) Procoracoid in glenoid (Gaetano & Abdala, 2015; #71):
- (0) present
  - (1) barely present or absent
- 150) Dorsal margin of the coracoid in medial view related to that of the procoracoid (Gaetano & Abdala, 2015; #72):
- (0) shorter
  - (1) equal or longer

- 151) Cranial margin of the procoracoid (Gaetano & Abdala, 2015; #73):
- (0) convex
  - (1) nearly straight
  - (2) obviously concave
- 152) Angle between ventral margin on anterior and posterior process of iliac blade (Gaetano & Abdala, 2015; #74):
- (0) small (e.g., less than 140 degree)
  - (1) large
- 153) Length of anterior process of ilium anterior to acetabulum (relative to diameter of acetabulum) (Gaetano & Abdala, 2015; #75):
- (0) less than 1.5
  - (1) greater than 1.5
- 154) Dorsal profile of ilium (Gaetano & Abdala, 2015; #76):
- (0) convex
  - (1) flat or concave
- 155) The trochanter major position related to the femoral head (Gaetano & Abdala, 2015; #77):
- (0) distal
  - (1) close, major part in same height
- 156) Major palatine foramen (Gaetano & Abdala, 2015; #78):
- (0) at axillary/palatine suture
  - (1) penetrating palatine
- 157) Number of crurae (Gaetano & Abdala, 2015; #79):
- (0) one
  - (1) two
- 158) Curvature of the crurae (Gaetano & Abdala, 2015; #80):
- (0) both crurae straight
  - (1) both crurae curved
  - (2) posterior crus curved, anterior crus straight
- 159) Relative size of the stapedial foramen (Gaetano & Abdala, 2015; #81):
- (0) large, aprox 3/4 of the total length of the stapes
  - (1) medium-sized, aprox 2/3 of the total length of the stapes
  - (2) small, aprox 1/2 of the total length of the stapes
- 160) Ossified portion of the stapes medial and lateral to the stapedial foramen (Gaetano & Abdala, 2015; #82):
- (0) medial and lateral ossified sectors restricted to the fusion of the crurae
  - (1) medial ossified sector constituting a platform
  - (2) lateral ossified sector constituting a platform
- 161) Relative size of the ossified portion of the stapes medial and lateral to the stapedial foramen (Gaetano & Abdala, 2015; #83):
- (0) medial portion wider than the lateral one
  - (1) lateral platform wider than the medial one
  - (2) medial portion as wide as the lateral one

- 162) Ossified dorsal process of the stapes (Gaetano & Abdala, 2015; #84):  
 (0) present  
 (1) absent
- 163) Anterior projection of the medial margin of the stapes in ventral view (Gaetano & Abdala, 2015; #85):  
 (0) absent  
 (1) present
- 164) Posterior projection of the medial margin of the stapes in ventral view (Gaetano & Abdala, 2015; #86):  
 (0) absent  
 (1) present
- 165) Anterior projection of the lateral margin of the stapes in ventral view (Gaetano & Abdala, 2015; #87):  
 (0) absent  
 (1) present
- 166) Posterior projection of the lateral margin of the stapes in ventral view (Gaetano & Abdala, 2015; #88):  
 (0) absent  
 (1) present
- 167) Stapedial footplate expanded dorsoventrally (Gaetano & Abdala, 2015; #89):  
 (0) absent  
 (1) present
- 168) Stapes length relative to the skull basal length (Gaetano & Abdala, 2015; #90):  
 (0) greater than 7%  
 (1) less than 5.5%
- 169) Anteriorly projected process that contacts the anapophyses in the cervical vertebrae (**New**):  
 (0) absent  
 (1) present
- 170) Intercentra in the cervical postaxial region (**New**):  
 (0) absent  
 (1) present
- 171) Inflated anterior and posterior margins of the cervical centra in lateral view (**New**):  
 (0) not inflated or only slightly inflated  
 (1) very inflated, bulbous

### 3. Phylogenetic analysis on our dataset

#### 3.1 Files

The Excel, Mesquite and TNT files are downloadable at <https://drive.google.com/drive/folders/1jD5S1h0r45rTNGYxXTPg0EnZVcx8ISQ1?usp=sharing> and can be obtained by request to the corresponding author.

```

xread
171 42
Thrinaxodon      [0 1]02--002000102--?2000[0 1]0000000-10-----100-----11-----
0001?00101010??300000??0010201100000000000020010000000001010000000010[1 2][0 1 2 3][0 1 2]01101[0 1][0
1]010
Cynognathus      001000020001000?0100010000000-00-----000-----00-----
000100[0 1]1000[0 1]00--000000000101110000000000000100000000000000000000???????????011
Diademodon       0100000200010010110000000011100101000000-10010000-000000-00000000[0
2]0001010000000-210?0?0000[0 1 2]1000012010011-
0100010000011111100000000010001010000001000001000010232?110010011
Titanogomphodon   ??????????????????????????[0 1]0??010?0000-10000000-????010??00?0??2-
0????????????????????011????????????10????0?0?1?1???0?00?0?00? ???????0????????????????????
?
Cricodon          ?010[0 1]0020001011100000001??0?[2 3]0?[0 1]02100010-1111110-0[0 1]0100-
01000000000011100000010120???0000[1 2]0[0 1]1[0 1]0120111020-
10101001??0?111?0?0???0???0???000001100?????0????????????????
Trirachodon       01[0 2]0000200010[0 2]11[1 2]000000[0 1]10[0 1]1[2 3]011020000[0 1]0-11110010-010[0
1]0101?000000000111010000010120???0000[1 2]00010020101032110111001111011110100[0
1]01001000101000001100000000?0112100100100001
Langbergia        0101000200010010110000000001211100000000-
1001101100100010?1000000000111110001010120???0000[0 1]0000002010[1 2]01-
110111?011101111110100001001000?01000000?????????012130?111100??
Sinognathus       ?00?00020000??0?000001??0???102000000-11110?10-0?0000-
?1102000000111?0000?0????????????????????????????1010?012111?110?1?10100200???1000001??????????
????????????????
Beishanodon       ??????02?00???????100???000??[0 2]1101000020-10120010-000000-
00100000?00? ?????????????????????????????????????10????12110?100?00101002000?1?????1?????????1??
??????????????
CGS_100           ?02--00?000?12--01000000?0?211111000000-
1001121112001010100000000001?22200000110200?0?0000100?1002011????10001101?????1???00?1?0?0???
??000000????????????????????????
BP/1/5538         ?????????????????????????????[1 2]???01000000-
?00100110100002011?00000000????????????????????????200011--0112-0--
?01?0????????????????????????????????0? ?????????????????????????
Etjoia            ?010100?01010101010?000100??0?201101000000-[1 2]?1110120[0 1]10[0 1]01000?0000010011222011011-
1?0110?[0 2]02-000010120112-0--110001?121???111???10???1200???0000001????????????????????100
Nanogomphodon     ?????????????????????????????????????????????????????????22?001?1102100?001100????
????????????110?01????11????????????????????????????????????????????
Scalenodon        0011010200010010?00000?0001302102100010-10?211120120100-002-3100000[0
1]0222011110-100010?11[0
1]0????????????????1101010120???11????00???0200???10?001?????00?0?10010?000000???
Scalenodon_ribeiroae 002--?0201????????101???101?30?102?00000-11221?11110100-
00??3100100????????????????????-----
110????1??10???1?0?0?1?02?0????????1????????????????????
Pascualgnathus    102--0010001?2--2100000000003011120000010101110121201-00-002-20002-
010222?01????????????????-----
11010??1101?1111011?1?100000?0100000110100?0011????????????????
Andescynodon      112--00200011000210000000001[2 3]011110000010101010120211100-002-20002-
010222011120-20001011110110220200022-1-
1110000?110?1111101101?100000???100000110?111111????????????????
Luangwa_drysalli  102--0020001011?0100010???0?301102000000-1012101200001020001001100101[0
1]21[0 2]101020-20011000100-----
110002?101?0?110???00?00010??010110011010000110?100?0?1?000???
```

Luangwa\_sudamericana 100000120001011?0100?10?000?301101000000-?112101200?010100010[1  
2]11001010222101000-100110?[1 2]110-----  
110000?1??10?11???00?1?001????111001?????????0?????????????  
Traversodon 10???00200010????10010?000?321112000020-1012101200?0102000100?100101021[0  
2]101?0?????0???2-??-----110??0?1??11?11??1?00?1?1110???111001?0111???1?????????????  
Mandagomphodon\_hirschsoni 102--111101002--0?011111?0?321111000000-10?2101101?01010112-  
301001010222001?00-20001012-00-----  
110110?1????1?0110?11?0?001?1?00?001????????????????????  
Mandagomphodon\_attridgei 102--00100??????01????1?0?321111000000-2?12101?011010101100[0  
3]010010????????????????????-----  
110??????10????0110?11???0?0??????1?????????0?????????????  
Dadadon 0[1 2][1 2]11102010102--11201[0 1]0[0 1]0[0 1]013021120211221221210111[0 1]011[1 2]010[0  
2]1[2 3]2[1 2]001101222011020-23011002-01-----  
11000011110111110111003001??100?001????????????????????  
Santacruzodon 22101112011102--210011?1100?3011[1 2]101112212??210120100112010013020011[0 1][0  
1]222021120-20011002-01-----11010011??01?111??0??0?03?????011001?????????0?0?????????????  
Massetognathus\_pascuali 22101002010102--211101001011[2 3]0211202[1 2]10[0 1]12112[0 1]01[1 2][0  
1]100110-1010300001100210021020-200110?2-00100220200022-1--110001?111[0 1]1111111011100[0  
2]00100100000100?111111101[0 1][1 2][1 2][0 1][0 1][0 1][0 1][0 1]0001  
Massetognathus\_ochagaviae 102--002010102--?11010?001?301112021100-211200111100-10-  
10103000101002000210?0-2?011??2-??-----  
11000??12111??11110112002001?01??0001??1??????0?????????????  
Boreogomphodon 002--002000102--110100001101202122[0 1]1[0 1]02111[0 1]121011[0 1]22010101010[0  
3]00010[0 1]1132201101[0 1]020001001111[1 2]00220020[0 1]02-21-  
1101101121011?0??101?2002001??100111101?112??11?????????????  
Plinthogomphodon ?02--?0200??????00??????0?2[0 2]2[0 1][0 2]20110[0  
2]11?0?2101112?0102010102000101????????????????????200?00202???21-  
110????1????????????????????????????????????????????  
Arctotraversodon 0?101?????010??????10??????121????2????21210-2?000??1000300???1?02[0  
1]00010010?0011112-2-??????????????1100?0[0  
1]0????1????????????????10?11????????????????????  
Gomphodontosuchus 012--00211011???0?10?110110?322111011020-1012001111?1-00-  
101130101111?222?01000-?1011??2-??-----  
11000??????1???1?0?0?1?0?0??11?001????????????????????  
Menadon\_Madagascar 012--1121111000-1110111010023221110100011101200111101-  
1101113021111102??2?1010-??0??1?2-??-----  
11000??10100?1111?01?011210??101100101?1?0111??10000?010100011  
Menadon\_Brazil 012--102?10102--0111?110000?3321300100011001200111101-11011103020111122201010-  
1?011112-10-----11000?010100?11011?01?011210???101100101?1?0111??10000?010100???  
Protuberum 002--01111??2--0?221???000?322111020000-1212[0 1]01[0 1]12[0 2]1-00010103020[1  
2]01????????????????????????????????11000?1101101110?111011111111??1????110?????????????  
??001  
Ruberodon 0????????110??????[0 1]????????????????????????????????1022201010-  
21011112-????????????????110?0?0????1????????????????01101????????????????  
Scalenodontoides 002--001111102--01220110100?32211202200222220010-101-00-0?103010111122211010-  
21111112-10-----11001?1012???110??11?111?11??11?1001????????????????  
Exaeretodon\_argentinus 002--001111102--1122011[0 1]100232211202122222210111101-  
1100111301011110222[0 1]1010-21111112-10-----  
11011?10001011101111111111?1101100101?1?11110130001001100000  
Exaeretodon\_riograndensis 012--001111102--0122011?1002322112022[0 1]22222210111[1 2]01-10-  
011130101111022211010-21111112-10-----  
11001?00000111011111111111??101100101????1110?????????????  
Siriusgnathus [0 1]12--?[0 1]0111[0 1]02--??22[0 1]1?100?322112122122122[1 2]2?0111101-110011130[0  
1]011110222?1010-21111112-10-----  
110????0?0001110?111112110111??1011001????????????????

Habayia ?????????????????????????????????00??020-??110111221-011102-  
3000000????????????????????????????????????11?0?1????????????????????????????????  
?????  
Maubeugia  
????????????????????????????????????????????????????????????31??01001220001112-2-  
????????????????11?011????????????????????????????????????????????  
Rosieria ?????????????????????????????12??000-??11010-221-010102-  
3000000????????????????????????????????11?0?1????????????????????????????????  
?????  
Microscalenodon ?????????????????????????????12??020-??20010-221-00-102-3000000?32??11100-  
010110?2-10????????????110?0?1????????????????????????????????????  
;

cnames

{0 Incisors,\_cross-section\_of\_mesialmost\_incisors\_at\_mid-crown: salinon\_or\_D-shaped\_  
subcircular,\_ovoid,\_lanceolate\_or\_thick\_lenticular\_parlinon-shaped\_or\_narrow\_lenticular;  
{1 Incisors,\_constriction\_at\_the\_crown\_base\_in\_some\_teeth: absent present,\_weak  
present,\_important\_(= \_folidont\_teeth);  
{2 Incisors,\_denticles: present\_and\_small,\_more\_than\_20\_mesial/distal\_denticles\_along\_the\_crown\_height  
present\_and\_large,\_less\_than\_20\_mesial/distal\_denticles\_along\_the\_crown\_height absent;  
{3 Incisors,\_denticles: present\_on\_the\_mesial\_and\_distal\_carinae present\_on\_the\_distal\_carina\_only;  
{4 Incisors,\_denticle\_orientation: perpendicular\_to\_carina diagonally\_oriented;  
{5 Incisors,\_numerous\_longitudinal\_ridges\_on\_labial\_surface\_in\_some\_teeth: absent present;  
{6 Upper\_incisors,\_crown\_base\_length\_(CBL)\_in\_adults: small,\_CBL\_shorter\_than\_that\_of\_canines  
enlarged,\_CBL\_of\_incisors\_as\_long\_or\_longer\_than\_that\_of\_canines;  
{7 Upper\_incisors,\_number: two three four five;  
{8 Upper\_incisors,\_procumbency: absent\_or\_very\_light present,\_strongly\_procumbent\_teeth  
present,\_only\_first\_incisor\_procumbent;  
{9 Upper\_incisors,\_diastema\_before\_upper\_canines: present,\_longer\_than\_the\_last\_upper\_incisor\_CBL  
absent\_or\_short,\_shorter\_than\_the\_last\_upper\_incisor\_CBL;  
{10 Lower\_incisors,\_CBL\_in\_adults: small,\_CBL\_shorter\_than\_that\_of\_canines  
enlarged,\_CBL\_of\_incisors\_as\_long\_or\_longer\_than\_that\_of\_canines;  
{11 Lower\_incisors,\_number: two three four;  
{12 Lower\_incisors,\_procumbency: present absent\_or\_very\_light;  
{13 Canines,\_denticles: present,\_more\_than\_15\_denticles\_per\_5\_mm\_along\_the\_distal\_carina  
present,\_15\_or\_less\_denticles\_per\_5\_mm\_along\_the\_distal\_carina absent;  
{14 Canines,\_denticle\_size\_along\_the\_carina: regular,\_gradual\_change\_in\_denticle\_size  
irregular,\_sporadic\_change\_in\_denticle\_size;  
{15 Canines,\_mesial\_denticles\_significantly\_larger\_than\_distal\_denticles\_(DSDI>1.2)\_in\_adults\_: absent present;  
{16 Canine,\_longitudinal\_ridges\_on\_some\_crowns: absent present,\_poorly\_defined\_ridges present,\_well-  
delimited\_ridges;  
{17 Canine,\_transverse\_undulations\_in\_adults: present absent;  
{18 Upper\_canines,\_position\_in\_relation\_to\_paracanine\_fossa: labiodistal labial labiomésial;  
{19 Upper\_canines,\_diastema\_before\_upper\_postcanines\_in\_adults:  
short,\_less\_than\_the\_mesiodistal\_length\_of\_the\_upper\_canine\_alveoli\_  
medium,\_more\_than\_the\_mesiodistal\_length\_of\_the\_upper\_canine\_alveoli\_but\_less\_than\_twice\_this\_length  
long,\_more\_than\_twice\_the\_mesiodistal\_length\_of\_the\_upper\_canine\_alveoli;  
{20 Upper\_canines,\_size\_in\_adult: large,\_upper\_canine\_height\_more\_than\_twice\_the\_upper\_incisor\_height  
reduced\_in\_size,\_upper\_canine\_height\_less\_than\_twice\_upper\_incisor's\_height upper\_canine\_absent;  
{21 Lower\_canines,\_diastema\_before\_lower\_postcanines\_in\_adults: long,\_longer\_than\_the\_lower\_canine\_CBL  
absent\_or\_short,\_shorter\_than\_the\_lower\_canine\_CBL;  
{22 Lower\_canines,\_size: large,\_lower\_canine\_height\_more\_than\_twice\_the\_lower\_incisor\_height  
reduced\_in\_size,\_lower\_canine\_height\_less\_than\_twice\_the\_lower\_incisor\_height lower\_canine\_absent;  
{23 Lower\_canines,\_procumbency: absent,\_crown\_apex\_projecting\_dorsally  
present,\_crown\_apex\_projecting\_mesiodorsally;  
{24 Paracanine\_fossa\_in\_cranium: deep\_and\_well\_delimited shallow\_and\_poorly\_delimited;

{25 Paracanine\_fossa\_in\_cranium: mesiodistally\_longer\_than\_mesiodistal\_length\_of\_upper\_canine\_alveoli  
same\_mesiodistal\_length\_or\_shorter\_than\_mesiodistal\_length\_of\_upper\_canine\_alveoli;  
{26 Upper\_postcanines,\_number: 11\_or\_less more\_than\_11;  
{27 Upper\_postcanines,\_variation\_in\_the\_number\_of\_teeth\_during\_ontogeny:  
number\_of\_teeth\_remaining\_stable\_during\_ontogeny number\_of\_teeth\_increasing\_during\_growth  
number\_of\_teeth\_decreasing\_during\_growth;  
{28 Upper/lower\_postcanines,\_formed\_by: sectorial\_only  
conical\_(more\_than\_two\_conical\_postcanines),\_gomphodont\_and\_sectorial  
conical\_(less\_than\_three\_conical\_postcanines),\_gomphodont\_and\_sectorial\_gomphodont\_only;  
{29 Upper\_postcanines,\_long\_axis\_of\_mid-gomphodont\_teeth:  
roughly\_perpendicular\_to\_the\_long\_axis\_of\_the\_cranial\_tooth\_row  
diagonally\_and\_labiodistally\_(or\_linguomesially)\_oriented\_from\_the\_long\_axis\_of\_the\_cranial\_tooth\_row  
diagonally\_and\_labiomesially\_(or\_linguodistally)\_oriented\_from\_the\_long\_axis\_of\_the\_cranial\_tooth\_row  
parallel\_to\_the\_long\_axis\_of\_the\_cranial\_tooth\_row;  
{30 Upper\_postcanines,\_number\_of\_subcircular\_alveoli/\_crowns\_with\_a\_subcircular\_cross-  
section\_in\_the\_mesial\_portion\_of\_the\_tooth\_row: more\_than\_two one\_or\_two absent;  
{31 Upper\_postcanines,\_one\_or\_several\_sectorial\_teeth\_in\_the\_mesial\_portion\_of\_the\_tooth\_row: present absent;  
{32 Upper\_postcanines,\_overall\_morphology\_of\_gomphodont\_teeth\_in\_occlusal\_view: ovoid-ellipsoid  
nearly\_rectangular nearly\_triangular nearly\_quadragonal\_or\_polygonal;  
{33  
Upper\_postcanines,\_elongation\_ratio\_(labiolingual\_length/mesiodistal\_width)\_of\_widest\_upper\_gomphodont\_postca-  
anine: <1.4 1.4-1.8 >1.8;  
{34 Upper\_postcanines,\_distal\_inclination\_of\_the\_last\_gomphodont\_teeth\_in\_relation\_to\_the\_axis\_of\_the\_skull:  
absent\_or\_weak oblique;  
{35  
Upper\_postcanines,\_imbrication\_(different\_of\_shouldering)\_of\_the\_mesial\_margin\_in\_mesial\_gomphodont\_postca-  
nines: absent\_slightly\_developed,\_only\_the\_mesiocentral\_part\_of\_the\_crown\_is\_imbricated well-  
developed,\_most\_of\_the\_crown\_mesial\_margin\_is\_imbricated\_(shouldering);  
{36  
Upper\_postcanines,\_imbrication\_(different\_of\_shouldering)\_of\_the\_mesial\_margin\_in\_distal\_gomphodont\_\_postca-  
nines: absent\_slightly\_developed,\_only\_the\_mesiocentral\_part\_of\_the\_crown\_is\_imbricated well-  
developed,\_most\_of\_the\_crown\_mesial\_margin\_is\_imbricated\_(shouldering);  
{37 Upper\_postcanines,\_strong\_lingual\_inclination\_of\_labial\_margin\_of\_gomphodont\_teeth:  
absent,\_labial\_surface\_straight\_or\_only\_weakly\_inclined\_lingually  
present,\_labial\_margin\_strongly\_inclined\_lingually;  
{38 Upper\_postcanines,\_transverse\_symmetry\_of\_the\_labial\_and\_lingual\_halves\_of\_largest\_gomphodont\_teeth:  
sub-symmetrical,\_the\_labial\_and\_lingual\_halves\_of\_the\_crown\_have\_the\_same\_mesiodistal\_length  
asymmetrical,\_the\_lingual\_half\_of\_the\_crown\_is\_significantly\_mesiodistally\_longer\_than\_the\_labial\_half\_  
asymmetrical,\_the\_labial\_half\_of\_the\_crown\_is\_significantly\_mesiodistally\_longer\_than\_the\_lingual\_half\_;  
{39 Upper\_postcanines,\_apicobasal\_groove(s)\_on\_the\_labial\_surface\_of\_some\_gomphodont\_teeth: absent  
present,\_no\_more\_than\_a\_single\_groove present,\_two\_grooves;  
{40 Upper\_postcanines,\_apicobasal\_groove(s)\_on\_the\_labial\_surface\_of\_some\_gomphodont\_teeth  
distal\_to\_labial\_cusp mesial\_to\_labial\_cusp mesial\_and\_distal\_to\_labial\_cusp;  
{41 Upper\_postcanines,\_extension\_in\_labial\_view: anterior\_to\_orbit below\_anterior\_half\_of\_orbit  
below\_posterior\_part\_of\_orbit\_or\_posterior\_to\_orbit;  
{42  
Upper\_postcanines,\_extension\_of\_distalmost\_margin\_of\_tooth\_relative\_to\_anteriormost\_margin\_of\_the\_subtemporal-  
al\_fossa\_in\_palatal\_view: anterior\_at\_the\_same\_level posterior;  
{43 Long\_axis\_of\_distal\_part\_of\_upper\_postcanine\_row\_in\_palatal\_view:  
directed\_towards\_the\_lateral\_part\_of\_the\_subtemporal\_fossa  
directed\_towards\_the\_center\_of\_the\_subtemporal\_fossa  
directed\_towards\_the\_medial\_part\_of\_the\_subtemporal\_fossa;  
{44 Position\_of\_transverse\_crest\_on\_upper\_gomphodont\_postcanines: on\_the\_mesial\_half\_of\_crown  
on\_the\_central\_part\_of\_crown on\_the\_distal\_half\_of\_the\_crown;  
{45 Transverse\_crest\_in\_upper\_gomphodont\_postcanines: low\_ridge high\_crest;

{46 Transverse\_crest\_morphology\_in\_upper\_gomphodont\_postcanines: smooth\_ridge showing\_some\_serrated\_portions bearing\_one\_or\_several\_distinct\_central\_accessory\_cusps\_(cuspidated);  
{47  
Transverse\_crest\_one\_or\_several\_accessory\_ridges\_on\_the\_mesial/distal\_surface\_of\_the\_crest\_in\_some\_upper\_gomphodont\_postcanines present absent;  
{48  
Transverse\_crest\_deep\_labial\_valley\_between\_labial\_and\_central/lingual\_cusp\_in\_upper\_gomphodont\_postcanines : absent present, basal\_extension\_at\_the\_same\_level\_or\_close\_to\_the\_level\_of\_occlusal\_basins, well-separated\_cusps present, basal\_extension\_significantly\_higher\_than\_the\_occlusal\_basins;  
{49  
Transverse\_crest\_deep\_labial\_valley\_between\_labial\_and\_central/lingual\_cusp\_in\_upper\_gomphodont\_postcanines: labiolingually\_narrow, less\_than\_one-third\_of\_the\_labiolingual\_length\_of\_crown labiolingually\_wide, more\_than\_one-third\_of\_the\_labiolingual\_length\_of\_crown;  
{50 Widest\_cusp\_labiolingually\_in\_transverse\_crest\_of\_unworn\_upper\_gomphodont\_postcanines: central labial lingual;  
{51 Height\_of\_the\_labial\_and\_lingual\_cusps\_in\_unworn\_upper\_gomphodont\_postcanines: labial\_higher\_than\_lingual labial\_as\_high\_as\_lingual labial\_lower\_than\_lingual;  
{52 Number\_of\_cusps\_in\_the\_transverse\_crest\_of\_unworn\_upper\_gomphodont\_postcanines: three\_or\_more two, central\_cusp\_merged\_with\_lingual\_cusp;  
{53 Central\_cusp\_of\_transverse\_crest\_in\_upper\_gomphodont\_postcanines: midway\_between\_labial\_and\_lingual\_cusps closer\_to\_lingual\_cusp;  
{54  
Labial\_cusp\_strong\_labial\_displacement\_from\_the\_rest\_of\_the\_crown\_in\_some\_upper\_gomphodont\_postcanines\_in\_apical\_view: absent\_or\_weak, labial\_surface\_of\_crown\_roughly\_convex present, labiomésial\_part\_of\_crown\_strongly\_protruding\_labially\_and\_subtriangular\_in\_apical\_view;  
{55 Labiomésial\_accessory\_cusp\_on\_unworn\_upper\_postcanines: absent one two\_or\_more;  
{56 Labiomésial\_accessory\_cusp\_on\_unworn\_upper\_postcanines: small, significantly\_smaller\_than\_main\_labial\_and\_lingual\_cusp large, as\_wide\_or\_almost\_as\_wide\_as\_main\_labial\_cusp;  
{57 Labiodistal\_accessory\_cusp\_on\_unworn\_upper\_postcanines: present absent;  
{58 Linguomésial\_accessory\_cusp\_on\_unworn\_upper\_postcanines: absent present;  
{59 Mesial\_cingulum/ridge\_on\_unworn\_upper\_gomphodont\_postcanines: present, bearing\_distinct\_cuspules\_(cuspidated) present, no\_cuspules absent;  
{60 Mesial\_cingulum/ridge\_on\_unworn\_upper\_gomphodont\_postcanines: low\_ridge high\_and\_well-developed\_crest;  
{61 Distal\_cingulum/ridge\_on\_unworn\_upper\_gomphodont\_postcanines: present, bearing\_distinct\_cuspules\_(cuspidated) present, serrated present, smooth\_ridge absent;  
{62 Labial\_cingulum\_on\_mesial\_portion\_of\_upper\_gomphodont\_postcanines, labial\_to\_the\_labial\_cusp: absent present, serrated present, smooth\_ridge;  
{63 Lingual\_ridge\_on\_upper\_gomphodont\_postcanines: absent present, low present, high;  
{64 Central\_ridge\_mesial\_and\_parallel\_to\_transverse\_crest\_on\_some\_upper\_gomphodont\_postcanines: absent present;  
{65 Mesial\_basin\_on\_upper\_gomphodont\_postcanines: present, mesiodistally\_narrow, forming\_a\_labiodistally\_extended\_groove present, mesiodistally\_wide surface absent;  
{66 Mesial\_basin\_on\_upper\_gomphodont\_postcanines: sloping\_towards\_the\_mesial\_side\_of\_the\_crown converging\_towards\_the\_labiomésial\_side\_of\_the\_crown, deepest\_portion\_of\_the\_mesial\_basin\_situated\_labiomésially converging\_towards\_the\_linguomésial\_side\_of\_the\_crown, deepest\_portion\_of\_the\_mesial\_basin\_situated\_linguomésially;  
{67 Distal\_basin\_on\_upper\_gomphodont\_postcanines: present absent;  
{68 Lower\_postcanines, number: 11\_or\_more less\_than\_11;  
{69 Lower\_postcanines, covering\_by\_coronoid\_process\_of\_the\_mandible\_in\_labial/lingual\_view: coronoid\_process\_covers\_entirely\_the\_distalmost\_postcanine coronoid\_process\_does\_not\_cover\_entirely\_the\_distalmost\_postcanine;

{70 Lower\_postcanines,\_overall\_morphology\_of\_gomphodont\_teeth\_in\_occlusal\_view: circular ovoid-ellipsoid quadrangular\_or\_subrectangular subtriangular;

{71 Lower\_postcanines,\_elongation\_ratio\_(labiolingual\_length/mesiodistal\_width)\_of\_most\_labiolingually\_elongated\_lower\_gomphodont\_postcanine: >1.5 1.1-1.5 <1.1;

{72 Lower\_postcanines,\_long\_axis\_of\_gomphodont\_tooth\_in\_apical\_view: perpendicular\_to\_the\_long\_axis\_of\_the\_mandibular\_tooth\_row strongly\_diagonally\_oriented\_from\_the\_long\_axis\_of\_the\_mandibular\_tooth\_row parallel\_to\_the\_long\_axis\_of\_the\_mandibular\_tooth\_row;

{73 Lower\_postcanines,\_distal\_inclination\_of\_mesial\_teeth\_from\_the\_main\_axis\_of\_the\_alveolar\_margin\_in\_labial\_view: absent,\_tooth\_nearly\_vertical present,\_slightly\_inclined\_distally present,\_strongly\_inclined\_distally;

{74 Lower\_postcanines,\_labiolingual\_constriction\_in\_the\_transversal\_plane\_of\_distal\_gomphodont\_teeth\_at\_mid-crown\_in\_apical\_view: absent weak important;

{75 Transverse\_crest\_in\_lower\_gomphodont\_postcanines: central mesial;

{76 Transverse\_crest\_in\_lower\_gomphodont\_postcanines,\_valley\_between\_labial\_and\_central/lingual\_cusps: absent\_or\_shallow present\_and\_deep;

{77 Labial\_ridge/crest\_in\_unworn\_lower\_gomphodont\_postcanines: absent present,\_smooth\_ridge present,\_crenulated\_crest/cingulum;

{78 Number\_of\_cusps\_in\_the\_transverse\_crest\_of\_the\_unworn\_lower\_gomphodont\_postcanines: two three\_or\_more;

{79 Central\_cusp\_of\_transverse\_crest\_in\_lower\_gomphodont\_postcanines: midway\_between\_labial\_and\_lingual\_cusps closer\_to\_lingual\_cusp closer\_to\_labial\_cusp;

{80 Height\_of\_the\_labial\_and\_lingual\_cusps\_in\_the\_lower\_gomphodont\_postcanines: labial\_lower\_than\_lingual labial\_as\_high\_as\_lingual labial\_higher\_than\_lingual;

{81 Widest\_cusp\_labiolingually\_in\_transverse\_crest\_of\_unworn\_lower\_gomphodont\_postcanines: lingual labial central lingual\_and\_labial\_of\_same\_size;

{82 Lower\_postcanines,\_strong\_distal\_inclination\_of\_lingual\_cusp\_from\_labial\_cusp\_in\_distalmost\_gomphodont\_teeth\_in\_lingual\_view: absent,\_main\_axis\_of\_lingual\_and\_labial\_cusps\_subparallel\_ present,\_lingual\_cusp\_strongly\_distally\_inclined\_from\_labial\_cusp;

{83 Labiomesial\_accessory\_cusp\_on\_unworn\_lower\_gomphodont\_postcanines: present absent;

{84 Linguomesial\_accessory\_cusp\_on\_unworn\_lower\_gomphodont\_postcanines: present absent;

{85 Labiodistal\_accessory\_cusp\_on\_unworn\_lower\_gomphodont\_postcanines: present absent;

{86 Linguodistal\_accessory\_cusp\_on\_unworn\_lower\_gomphodont\_postcanines: present absent;

{87 Mesial\_cingulum\_in\_unworn\_lower\_gomphodont\_postcanines: disposed\_along\_the\_entire\_mesial\_margin\_of\_the\_crown reduced,\_cingulum\_centrally\_or\_labially\_positioned\_on\_the\_mesial\_margin\_of\_the\_crown absent;

{88 Mesial\_cingulum\_in\_unworn\_lower\_gomphodont\_postcanines: separated\_from\_the\_transverse\_crest\_by\_a\_mesial\_basin directly\_adjacent\_to\_transverse\_crest;

{89 Distal\_cingulum/ridge\_on\_unworn\_lower\_gomphodont\_postcanines: present,\_serrated\_or\_bearing\_distinct\_cuspules\_(cuspidated) present,\_smooth\_ridge absent;

{90 Distal\_cingulum/ridge\_on\_unworn\_lower\_gomphodont\_postcanines: low\_ridge high\_crest;

{91 Upper/Lower\_sectorial\_postcanines\_(intermediate\_postcanine\_included),\_number: more\_than\_3 two\_or\_three one;

{92 Sectorial\_postcanines,\_intermediate\_gomphodont/sectorial\_tooth: absent present;

{93 Sectorial\_postcanines,\_elongation\_axis\_of\_upper\_teeth roughly\_parallel\_to\_the\_labial\_margin\_of\_the\_cranium\_or\_aligned\_with\_the\_main\_axis\_of\_the\_upper\_tooth\_row strongly\_diagonally\_and\_mesiolingually\_oriented\_from\_the\_labial\_margin\_of\_the\_cranium\_and\_the\_main\_axis\_of\_the\_upper\_tooth\_row;

{94 Sectorial\_postcanines,\_main\_cusp\_in\_most\_teeth strongly\_distally\_recurved,\_tip\_pointing\_almost\_distally,\_extending\_above\_the\_distal\_main\_cusp poorly\_distally\_recurved,\_tip\_pointing\_slightly\_apicodistally\_and\_not\_extending\_above\_the\_distal\_main\_cusp straight;

{95 Sectorial\_postcanines, \_main\_cusp\_in\_most\_teeth large, \_occupies\_more\_than\_half\_the\_sectorial\_crown\_length  
 medium-sized, \_occupies\_one\_half\_of\_sectorial\_crown\_length  
 small, \_occupies\_less\_than\_a\_half\_of\_sectorial\_crown\_length;  
 {96 Sectorial\_postcanines, \_mesial\_main\_cusp\_in\_some\_teeth: present absent;  
 {97 Sectorial\_postcanines, \_mesial\_main\_cusp\_in\_most\_teeth: large, \_strongly\_protruding\_from\_sectorial\_crown  
 reduced\_in\_size, \_but\_not\_forming\_a\_crenulated\_ridge  
 reduced\_in\_size, \_and\_forming\_a\_crenulated\_ridge\_with\_the\_mesial\_accessory\_cusps\_of\_similar\_size;  
  
 {98 Sectorial\_postcanines, \_highest\_number\_of\_mesial\_accessory\_cusp(s)\_mesial\_to\_the\_mesial\_main\_cusp:  
 present, \_more\_than\_one\_mesial\_accessory\_cusps present, \_a\_single\_mesial\_accessory\_cusp absent;  
 {99 Sectorial\_postcanines, \_distal\_main\_cusp\_in\_at\_least\_some\_teeth: present absent \_ absent;  
 {100 Sectorial\_postcanines, \_highest\_number\_of\_distal\_accessory\_cusp(s)\_distal\_to\_the\_mesial\_main\_cusp:  
 present, \_more\_than\_one\_distal\_accessory\_cusps present, \_a\_single\_distal\_accessory\_cusp absent;  
 {101 Sectorial\_postcanines, \_distal\_accessory\_cusp\_in\_most\_teeth:  
 large, \_strongly\_protruding\_from\_sectorial\_crown reduced\_in\_size, \_but\_not\_forming\_a\_crenulated\_ridge  
 reduced\_in\_size, \_and\_forming\_a\_crenulated\_ridge\_with\_the\_mesial\_accessory\_cusps\_of\_similar\_size;  
 {102 Sectorial\_postcanines, \_serrations\_on\_the\_mesial\_carina\_in\_some\_teeth:  
 present\_on\_most\_of\_the\_crown\_height present\_on\_the\_apical\_part\_of\_the\_crown absent;  
 {103 Sectorial\_postcanines, \_shape\_of\_mesial\_denticles: convex  
 biserrated, \_with\_a\_small\_basal\_denticle\_and\_a\_larger\_distal\_denticle;  
 {104 Sectorial\_postcanines, \_cingulum/cingular\_cusps\_in\_some\_teeth: absent present\_lingually present\_labially  
 present\_both\_lingually\_and\_labially;  
 {105 Sectorial\_postcanines, \_labial\_cingulum\_in\_some\_upper\_postcanines: well-  
 developed\_multicuspid\_cingulum\_forming\_a\_collar non-cuspidate\_ridge\_not\_forming\_a\_collar  
 one\_or\_two\_cingular\_cusps;  
 {106 Sectorial\_postcanines, \_labial\_cingulum\_in\_some\_lower\_postcanines: well-  
 developed\_multicuspid\_cingulum\_forming\_a\_collar  
 poorly\_developed\_multicuspid\_cingulum\_not\_forming\_a\_collar one\_or\_two\_cingular\_cusps;  
 {107 Postcanine\_occlusion: absent present;  
 {108 Deep\_occlusal\_basins\_in\_the\_postcanines: absent present;  
 {109  
 Shearing\_planes\_between\_the\_outer\_surface\_of\_the\_main\_cusp\_of\_the\_lower\_and\_the\_inner\_surfaces\_of\_the\_mai  
 n\_cusps\_of\_the\_upper\_postcanines: present absent;  
 {110 Braided\_and\_oriented\_enamel\_surface\_texture\_in\_some\_incisors/canines:  
 absent, \_enamel\_texture\_of\_all\_incisors/canines\_smooth\_or\_irregular\_and\_non-oriented present;  
 {111 braided\_and\_oriented\_enamel\_surface\_texture\_in\_some\_postcanines:  
 absent, \_enamel\_texture\_of\_all\_postcanines\_smooth\_or\_irregular\_and\_non-oriented present;  
 {112 Lower\_postcanines, \_horizontal\_labiolingual\_constriction\_between\_crown\_and\_root\_in\_mesial/distal\_view  
 absent\_or\_weak, \_crown\_and\_root\_(almost)\_confluent important, \_strong\_constriction\_between\_crown\_and\_root;  
 {113 Postcanine\_root, \_length long, \_more\_than\_twice\_the\_largest\_crown\_height  
 short, \_less\_than\_twice\_the\_crown\_height;  
 {114 Adult\_maximum\_skull\_size: large\_(greater\_than\_25\_cm) medium\_to\_small;  
 {115 Snout\_(preorbit)\_in\_adults\_in\_relation\_to\_temporal\_region: longer subequal shorter;  
 {116 Two\_side\_of\_temporal\_fenestra\_(outline\_of\_zygoma): divergent\_posteriorly nearly\_parallel  
 bulge\_in\_the\_middle;  
 {117 Extranasal\_process\_of\_the\_premaxilla small large\_but\_not\_contacting\_the\_nasal;  
 {118 Septomaxilla\_facial\_process long short;  
 {119 Carotid\_artery\_foramina\_in\_basisphenoid present absent;  
 {120 Mandibular\_symphysis unfused fused;  
 {121 Zygomatic\_arch\_dorsoventral\_height moderately\_deep\_ very\_deep;  
 {122 Inferior\_margin\_of\_jugal\_in\_the\_zygoma low high;  
 {123 Premaxilla\_forms\_posterior\_border\_incisive\_foramen: absent present;  
 {124 Vomer\_exposure\_in\_incisive\_foramen\_(at\_anterior\_ends\_of\_maxillae\_on\_palate): present absent;  
 {125 Vomer\_vertical\_septum\_extending\_posteriorly\_beyond\_level\_of\_secondary\_palate: present absent;  
 {126 Internarial\_bar: present absent;  
 {127 Parietal\_foramen\_in\_adults: present absent;

{128 Ectopterygoid: present absent;  
 {129 Posterior\_extension\_of\_secondary\_palate\_relative\_to\_anterior\_border\_of\_orbit: anterior subequal posterior;  
 {130 Posterior\_extension\_of\_the\_jugal\_dorsally\_above\_the\_squamosal\_in\_the\_zygomatic\_arch:  
 absent\_or\_with\_small\_extension well\_developed;  
 {131 Position\_of\_anterior\_root\_of\_the\_zygomatic\_arch\_relative\_to\_the\_ventral\_margin\_of\_the\_maxilla:  
 nearly\_at\_same\_level\_or\_slightly\_higher remarkably\_higher;  
 {132 Zygomatic\_process\_of\_the\_jugal: little\_projected conspicuously\_projected absent a\_ball-like\_process;  
 {133 Diameter\_of\_suborbital\_bar\_below\_center\_of\_orbit\_(anterior\_to\_suborbital\_process,\_where\_present):  
 greater\_than\_1/2\_diameter\_of\_bar\_below\_posterior\_part\_of\_orbit\_(posterior\_to\_suborbital\_process)  
 less\_than\_1/2\_diameter\_of\_bar\_below\_posterior\_part\_of\_orbit;  
 {134 Maxilla\_in\_the\_margin\_of\_the\_subtemporal\_fenestra: excluded included;  
 {135 Epipterygoid-quadrato\_contact: present absent;  
 {136 Frontal-epipterygoid\_contact: present absent;  
 {137 Palatine: does\_not\_meet\_frontal  
 meets\_frontal\_but\_neither\_element\_contributes\_significantly\_to\_medial\_orbit\_wall;  
 {138 Notch\_separating\_lambdaoidal\_crest\_from\_zygomatic\_arch: shallow deep\_v-shaped;  
 {139 Lower\_jaw\_symphysis\_as\_a\_chin-like\_process\_in\_adults: absent\_or\_little\_developed well-developed;  
 {140 Dentary\_with\_sigmoid\_ventral\_curvature: absent present;  
 {141 Dentary-angular\_process: not\_or\_very\_weakly\_projected\_posteriorly  
 projected\_posteriorly\_as\_distinct\_process;  
 {142 Elongated\_mental\_foramen\_below\_postcanine\_tooth\_row\_and\_above\_coronoid\_ridge: absent present;  
 {143 Coronoid\_ridge\_anterior\_to\_masseteric\_fossa: absent\_to\_low very\_strong,\_outturned;  
 {144 Maxillary\_labial\_platform\_lateral\_to\_the\_postcanine\_series: absent present;  
 {145 Anapophysis: absent present;  
 {146 Expanded\_costal\_plates\_on\_ribs: present absent;  
 {147 Lumbar\_costal\_plates\_with\_ridge\_overlapping\_preceding\_rib: present absent;  
 {148 Procoracoid\_in\_glenoid: present\_barely\_present\_or\_absent;  
 {149 Dorsal\_margin\_of\_the\_coracoid\_in\_medial\_view\_related\_to\_that\_of\_the\_procoracoid: shorter  
 equal\_or\_longer;  
 {150 Cranial\_margin\_of\_the\_procoracoid: convex nearly\_straight obviously\_concave;  
 {151 Angle\_between\_ventral\_margin\_on\_anterior\_and\_posterior\_process\_of\_iliac\_blade:  
 small\_(e.g.,\_less\_than\_140\_degree) large;  
 {152 Length\_of\_anterior\_process\_of\_ilium\_anterior\_to\_acetabulum\_(relative\_to\_diameter\_of\_acetabulum):  
 less\_than\_1.5 greater\_than\_1.5;  
 {153 Dorsal\_profile\_of\_ilium: convex flat\_or\_concave;  
 {154 The\_trochanter\_major\_position\_related\_to\_the\_femoral\_head: distal close,\_major\_part\_in\_same\_height;  
 {155 Major\_palatine\_foramen: at\_axillary/palatine\_suture penetrating\_palatine;  
 {156 Number\_of\_crurae: one two;  
 {157 Curvature\_of\_the\_crurae: both\_crurae\_straight both\_crurae\_curved  
 posterior\_crus\_curved,\_anterior\_crus\_straight;  
 {158 Relative\_size\_of\_the\_stapedial\_foramen: large,\_aprox\_3/4\_of\_the\_total\_length\_of\_the\_stapes medium-  
 sized,\_aprox\_2/3\_of\_the\_total\_length\_of\_the\_stapes small,\_aprox\_1/2\_of\_the\_total\_length\_of\_the\_stapes;  
 {159 Ossified\_portion\_of\_the\_stapes\_medial\_and\_lateral\_to\_the\_stapedial\_foramen:  
 medial\_and\_lateral\_ossified\_sectors\_restricted\_to\_the\_fusion\_of\_the\_crurae  
 medial\_ossified\_sector\_constituting\_a\_platform lateral\_ossified\_sector\_constituting\_a\_platform;  
 {160 Relative\_size\_of\_the\_ossified\_portion\_of\_the\_stapes\_medial\_and\_lateral\_to\_the\_stapedial\_foramen:  
 medial\_portion\_wider\_than\_the\_lateral\_one lateral\_platform\_wider\_than\_the\_medial\_one  
 medial\_portion\_as\_wide\_as\_the\_lateral\_one;  
 {161 Ossified\_dorsal\_process\_of\_the\_stapes: present absent;  
 {162 Anterior\_projection\_of\_the\_medial\_margin\_of\_the\_stapes\_in\_ventral\_view: absent present;  
 {163 Posterior\_projection\_of\_the\_medial\_margin\_of\_the\_stapes\_in\_ventral\_view: absent present;  
 {164 Anterior\_projection\_of\_the\_lateral\_margin\_of\_the\_stapes\_in\_ventral\_view: absent present;  
 {165 Posterior\_projection\_of\_the\_lateral\_margin\_of\_the\_stapes\_in\_ventral\_view: absent present;  
 {166 Stapedial\_footplate\_expanded\_dorsoventrally: absent present;  
 {167 Stapes\_length\_relative\_to\_the\_skull\_basal\_length: greater\_than\_7% less\_than\_5.5%;  
 {168 Anteriorly\_projected\_process\_that\_contacts\_the\_anapophyses\_in\_the\_cervical\_vertebrae: absent present;

```

{169 Intercentra_in_the_cervical_postaxial_region: absent present;
{170 Inflated_anterior_and_posterior_margins_of_the_cervical_centra_in_lateral_view:
not_inflated_or_only_slightly_inflated very_inflated,_bulbous;
;

ccode + 1 7 11 18 19 26 28 30 33 35 36 41.44 51 71 73 74 91 115 129 150 *;

proc /;
comments 0
;

```

**3.3 Result of the cladistic analysis conducted on our data matrix (unconstrained search; eight MPTs of 662 steps, CI 0.3565, RI 0.6019).**

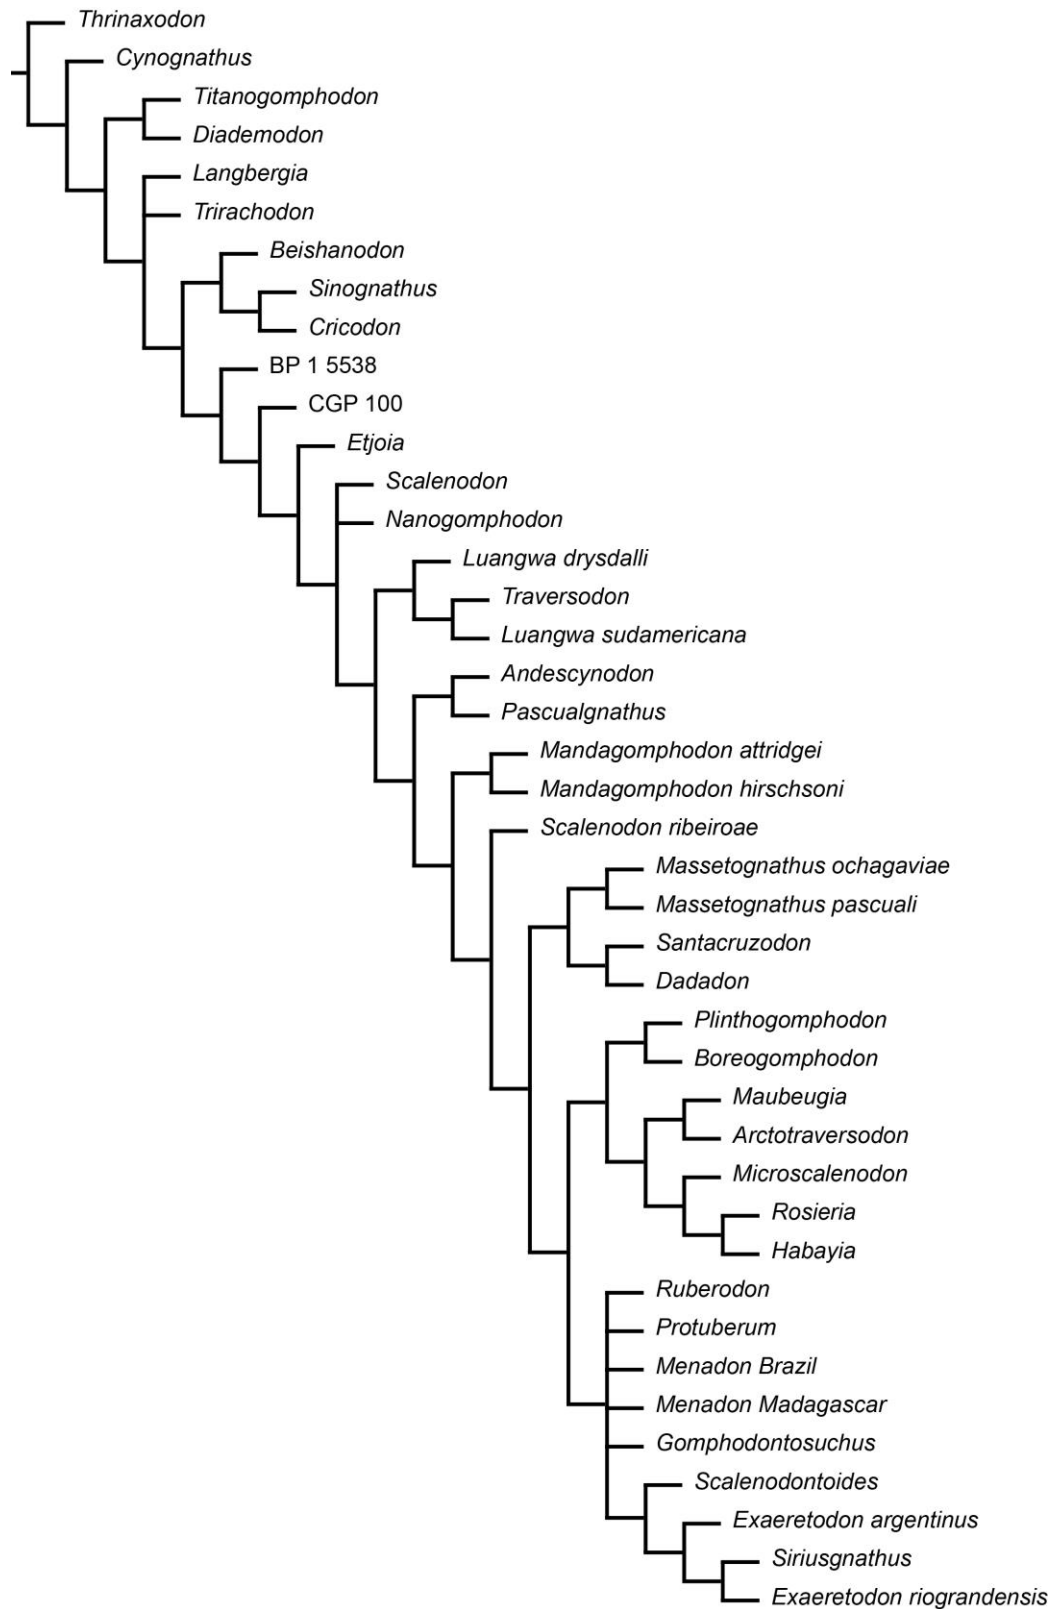



'Scalenodon\_ribeiroae' 1??1??0??1?02?0?????????110?1021?100?0?01??3010011111[0  
2]0000???????1???????????  
'Siriusgnathus\_niemeyerorum'  
0?0?1111121101????10110021111122010?1111011310121??00?1111210211111?????????  
'UFRGS\_PV\_0712'  
121????110?20?1?0100?01??001121010?00?0???3101111121200012102??101???????????  
Etjoia 121???10?101000???10000000010011110001200001001001110001102100130011?????????  
;

cnames

{0 Adult\_maximum\_skull\_size: large\_(greater\_than\_25\_cm) medium\_to\_small;  
{1 Snout\_(preorbit)\_in\_adults\_in\_relation\_to\_temporal\_region: longer subequal shorter;  
{2 Two\_side\_of\_temporal\_fenestra: divergent posteriorly nearly\_parallel bulge\_in\_the\_middle;  
{3 Premaxilla\_forms\_posterior\_border\_incisive\_foramen: absent present;  
{4 Vomer\_exposure\_in\_incisive\_foramen\_(at\_anterior\_ends\_of\_maxillae\_on\_palate): present absent;  
{5 Vomer\_vertical\_septum\_extending\_posteriorly\_beyond\_level\_of\_secondary\_palate: present absent;  
{6 Internarial\_bar: present absent;  
{7 Parietal\_foramen\_in\_adults: present absent;  
{8 Ectopterygoid: present absent;  
{9 Posterior\_extension\_of\_secondary\_palate\_relative\_to\_anterior\_border\_of\_orbit: shorter subequal longer;  
{10 Posterior\_extension\_of\_the\_jugal\_dorsally\_above\_the\_squamosal\_in\_the\_zygomatic\_arch:  
absent\_or\_with\_small\_extension well\_developed;  
{11 Position\_of\_anterior\_root\_of\_the\_zygomatic\_arch\_relative\_to\_the\_ventral\_margin\_of\_the\_maxilla:  
nearly\_at\_same\_level\_or\_slightly\_higher remarkably\_higher;  
{12 Zygomatic\_process\_of\_the\_jugal: little\_projected conspicuously\_projected absent\_a\_ball-like\_process;  
{13 Diameter\_of\_suborbital\_bar\_below\_center\_of\_orbit\_(anterior\_to\_suborbital\_process,\_where\_present):  
greater\_than\_1/2\_diameter\_of\_bar\_below\_posterior\_part\_of\_orbit\_(posterior\_to\_suborbital\_process)  
less\_than\_1/2\_diameter\_of\_bar\_below\_posterior\_part\_of\_orbit;  
{14 Maxilla\_in\_the\_margin\_of\_the\_subtemporal\_fenestra: excluded included;  
{15 Epipterygoid-quadrato\_contact: present absent;  
{16 Frontal-epipterygoid\_contact: present absent;  
{17 Palatine: does\_not\_meet\_frontal  
meets\_frontal\_but\_neither\_element\_contributes\_significantly\_to\_medial\_orbit\_wall;  
{18 Notch\_separating\_lambdaoidal\_crest\_from\_zygomatic\_arch: shallow deep\_v-shaped;  
{19 Lower\_jaw\_symphysis\_as\_a\_chin-like\_process\_in\_adults: absent\_or\_little\_developed well-developed;  
{20 Dentary\_with\_sigmoid\_ventral\_curvature: absent present;  
{21 Dentary-angular\_process: not\_or\_very\_weakly\_projected\_posteriorly  
projected\_posteriorly\_as\_distinct\_process;  
{22 Elongated\_mental\_foramen\_below\_postcanine\_tooth\_row\_and\_above\_coronoid\_ridge: absent present;  
{23 Coronoid\_ridge\_anterior\_to\_masseteric\_fossa: absent\_to\_low very\_strong,\_outturned;  
{24 Position\_of\_the\_upper\_canine\_in\_relation\_to\_paracanine\_fossa: postero-lateral lateral antero-lateral;  
{25 Diastema\_between\_upper\_incisors\_and\_canine: present absent;  
{26 Diastema\_between\_canine\_and\_maxillary\_postcanines\_in\_adult: short long;  
{27 Diastema\_between\_canine\_and\_dentary\_postcanines: long absent\_or\_very\_short;  
{28 Maxillary\_labial\_platform\_lateral\_to\_the\_postcanine\_series: absent present;  
{29 Posteromedial\_inclination\_of\_the\_last\_few\_upper\_gomphodont\_postcanines: absent\_or\_small oblique;  
{30 Axis\_of\_posterior\_part\_of\_maxillary\_tooth\_row: directed\_lateral\_to\_the\_temporal\_fossa  
directed\_towards\_center\_of\_fossa directed\_towards\_medial\_rim\_of\_fossa;  
{31 Maxillary\_tooth\_row\_extent\_relative\_to\_anterior\_margin\_of\_the\_subtemporal\_fossa\_in\_adult: anterior  
at\_the\_same\_level posterior;  
{32 Coronoid\_process\_of\_the\_mandible: cover\_the\_last\_postcanine does\_not\_cover;  
{33 Postcanine\_occlusion: absent present;  
{34  
Shearing\_planes\_between\_the\_outer\_surface\_of\_the\_main\_cusp\_of\_the\_lower\_and\_the\_inner\_surfaces\_of\_the\_mai  
n\_cusps\_of\_the\_uppers\_postcanines: present absent;  
{35 Upper\_incisor\_number: four three;

```

{36 Lower_incisor_number: three two;
{37 Incisor_procumbency: absent present;
{38 Incisor_cutting_margins: serrated smoothly_ridged denticulated;
{39 Incisor_size: small enlarged;
{40 Upper_canine_size: large reduced_in_size;
{41 Lower_canine_size: large reduced_in_size;
{42 Canine_serrations: present absent;
{43 Postcanine_tooth_row_in_adults: sectorial conical,_gomphodont_and_sectorial gomphodont_and_sectorial
gomphodont;
{44 Overall_morphology_of_the_upper_gomphodont_postcanines_in_occlusive_view: ovoid-ellipsoid
nearly_rectangular nearly_triangular;
{45 Labial_cingulum_on_anterior_portion_of_the_upper_postcanines_(external_to_the_sectorial_ridge): absent
present;
{46 Posterior_cingulum_on_upper_postcanines: present absent;
{47 Shouldering_in_the_posterior_margin_of_upper_postcanines: absent slightly_developed well-developed;
{48 Anterior_profile_of_principal_labial_cusp: convex concave;
{49 Number_of_cusps_in_the_transverse_crest_of_the_upper_postcanines: two three_or_more;
{50 Central_cusp_of_upper_transverse_row: midway_between_labial_and_lingual_cusps closer_to_lingual_cusp;
{51 Anterolabial_accessory_cusp_on_upper_postcanines: absent one_two_or_more;
{52 Posterolabial_accessory_cusp_on_upper_postcanines: present absent;
{53 Position_of_upper_transverse_cusp_row_on_crown: anterior_half_of_the_crown central
posterior_half_of_the_crown;
{54 Distinct_anterolingual_accessory_cusp_on_upper_postcanines: absent present;
{55 Anterior_cingulum_in_the_upper_postcanines: present absent;
{56 Anterior_transverse_crest_on_upper_postcanines: absent_or_low high;
{57 Lingual_ridge_on_upper_postcanines: absent present;
{58 Overall_morphology_of_the_lower_gomphodont_postcanines_in_occlusal_view: circular ovoid-ellipsoid
quadrangular;
{59 Transverse_crest_in_lower_postcanines: central anterior;
{60 Number_of_cusps_in_the_transverse_crest_of_the_lower_postcanines: two three_or_more;
{61 Anterior_cingulum_in_the_lower_postcanines: cuspules: cuspules_disposed_on_the_entire_margin
one_or_more_cuspules_located_anterolabially absent;
{62 Posterior_cingulum_on_the_lower_gomphodont_postcanines: present absent;
{63 Size_of_the_anterior_cusps_in_the_lower_postcanines: labial_lower_than_lingual labial_higher_than_lingual;
{64 Widest_lower_cusp_in_transverse_row_of_lower_postcanines: lingual labial middle;
{65 Anterolingual_cusp_of_lower_postcanines: nearly_vertical strongly_inclined_posteriorly;
{66 Deep_occlusal_basins_in_the_postcanines: absent present;
{67 Anapophysis: absent present;
{68 Expanded_costal_plates_on_ribs: present absent;
{69 Lumbar_costal_plates_with_ridge_overlapping_preceding_rib: present absent;
{70 Procoracoid_in_glenoid: present barely_present_or_absent;
{71 Dorsal_margin_of_the_coracoid_in_medial_view_in_related_to_that_of_the_procoracoid: shorter
equal_or_longer;
{72 Cranial_margin_of_the_procoracoid: convex nearly_straight obviously_concave;
{73 Angle_between_ventral_margin_on_anterior_and_posterior_process_of_iliac_blade:
small_(e.g.,_less_than_140_degree) large;
{74 Length_of_anterior_process_of_iliac_anterior_to_acetabulum_(relative_to_diameter_of_acetabulum):
less_than_1.5 greater_than_1.5;
{75 Dorsal_profile_of_iliac: convex flat_or_concave;
{76 The_trochanter_major_position_related_to_the_femoral_head: distal close,_major_part_in_same_height;
{77 Major_palatine_foramen: at_maxillary/palatine_suture penetrating_palatine;
;

```

```

proc /;
comments 0
;

```

**4.3 Result of the cladistic analysis conducted on Schmitt *et al.*'s (2019) data matrix (unconstrained search; 100 MPTs of 333 steps, CI 0.2913, RI 0.528).**

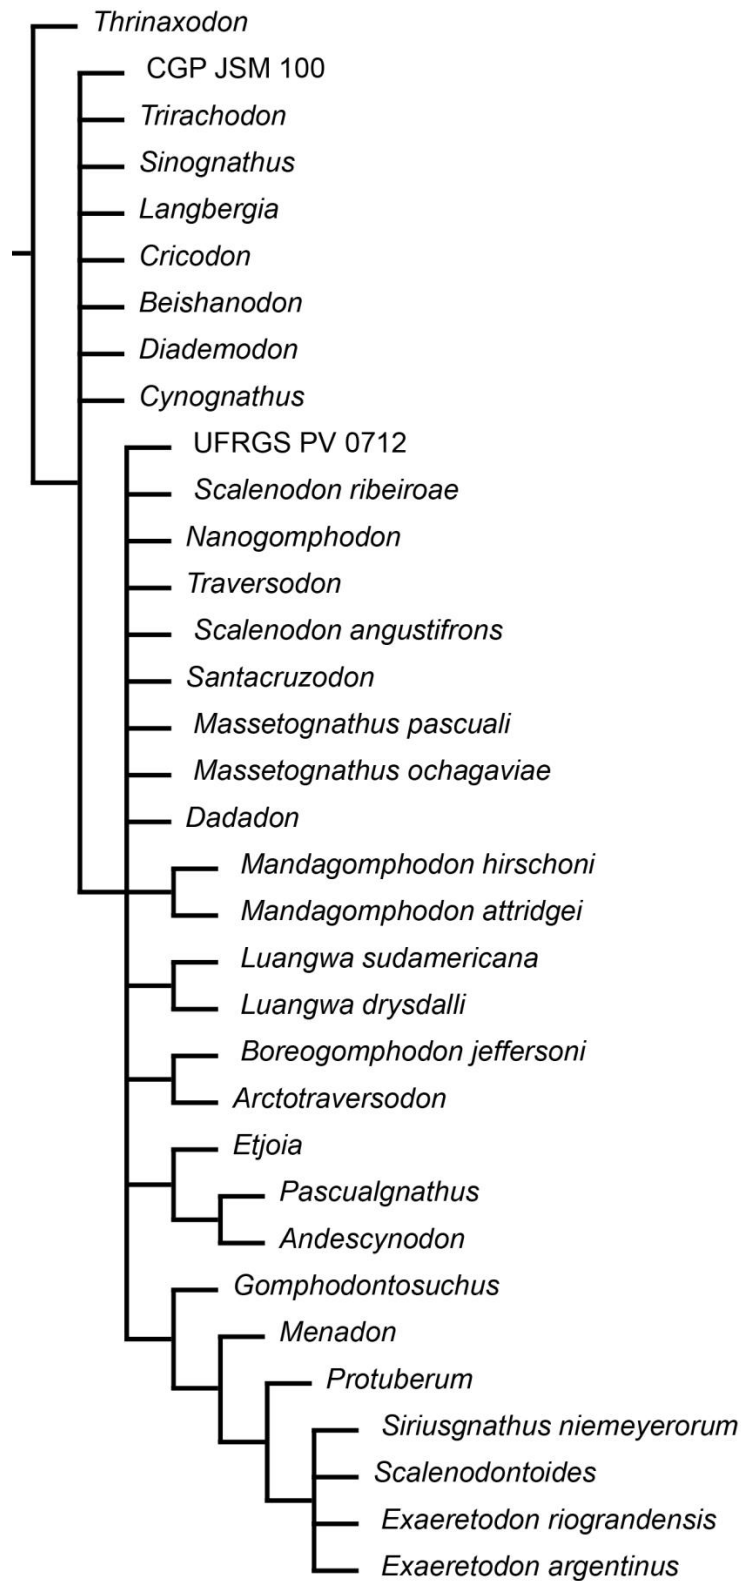

**4.4 Result of the cladistic analysis conducted on Schmitt *et al.*'s (2019) data matrix after the a posteriori deletion of CGS JSM 100 and *Nanogomphodon* (unconstrained search; 6 MPTs of 233 steps, CI 0.4163, RI 0.728).**

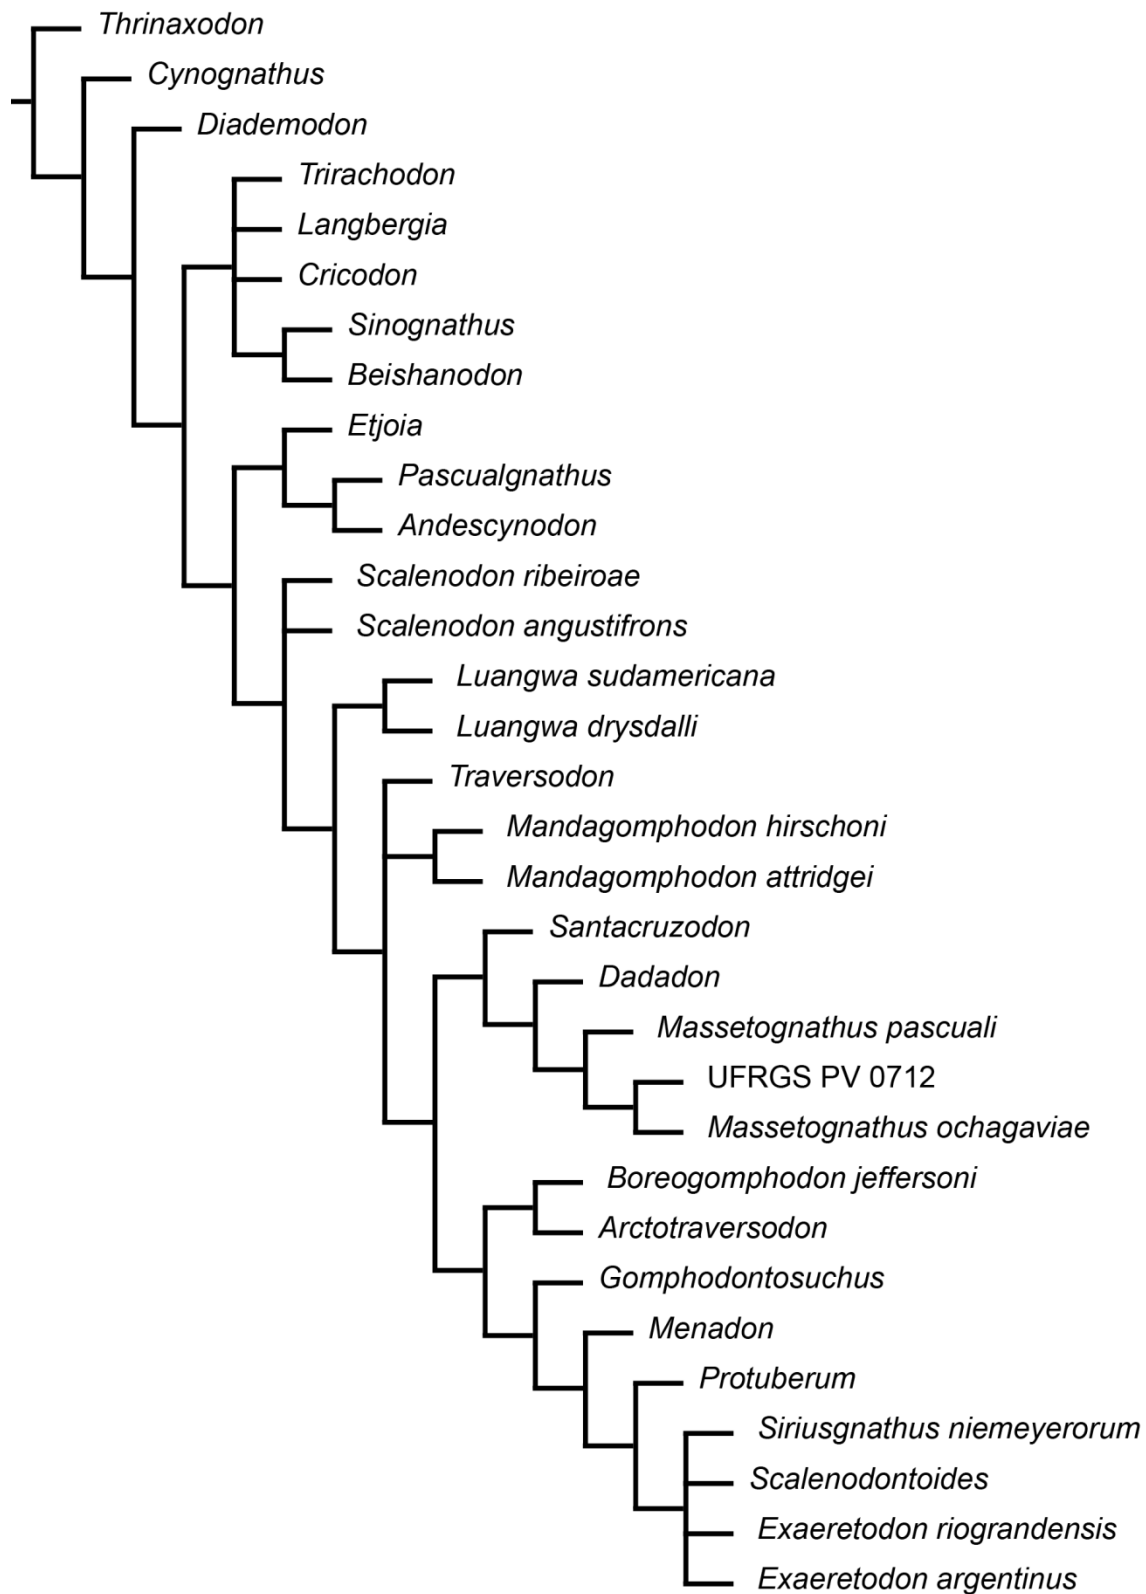



{12 (13)\_Zygomatic\_arch\_dorsal\_extent\_immediately\_behind\_orbit below\_middle\_of\_orbit\_ above\_middle\_of\_orbit;  
 {13 (14)\_Jugal\_depth\_in\_zygomatic\_arch\_relative\_to\_exposed\_squamosal\_depth less\_than\_twice\_ greater\_than\_twice;  
 {14 (15)\_Jugal\_suborbital\_process absent\_ present;  
 {15 (16)\_Squamosal\_groove\_for\_external\_auditory\_meatus shallow\_ moderately\_deep\_ very\_deep;  
 {16 (17)\_Frontal-palatine\_contact\_in\_orbit absent\_ present;  
 {17 (18)\_Descending\_flange\_of\_squamosal\_lateral\_to\_quadratejugal absent\_ present,\_not\_contacting\_surangular\_ present,\_contacting\_surangular;  
 {18 (19)\_Internal\_carotid\_foramina\_in\_basisphenoid present\_ absent;  
 {19 (20)\_Groove\_on\_prootic\_extending\_from\_pterygoparoccipital\_foramen\_to\_trigeminal\_foramen present\_and\_open\_ present\_and\_enclosed\_as\_a\_canal;  
 {20 (21)\_Trigeminal\_nerve\_exit\_between\_prootic\_incisure\_and\_epterygoid\_ via\_foramen\_between\_prootic\_and\_epterygoid\_ via\_two\_foramina;  
 {21 (22)\_Quadrate\_ramus\_of\_pterygoid present\_ absent;  
 {22 (23)\_Greatest\_width\_of\_zygomatic\_arch\_about\_middle\_of\_arch\_(anterior\_to\_level\_of\_quadrate)\_ at\_posterior\_end\_of\_arch\_(at\_level\_of\_quadrate);  
 {23 (24)\_Length\_of\_palatine\_relative\_to\_maxilla\_in\_secondary\_palate shorter\_ about\_equal\_ longer;  
 {24 (25)\_Posterolateral\_end\_of\_maxilla\_passes\_obliquely\_posterodorsally\_into\_suborbital\_bar\_ forms\_right\_angle\_ventral\_to\_jugal\_contact;  
 {25 (26)\_‘V’-shaped\_notch\_separating\_lambdaoidal\_crest\_from\_zygomatic\_arch absent\_ present;  
 {26 (27)\_Dentary\_symphysis not\_fused\_ fused;  
 {27 (28)\_Dentary\_masseteric\_fossa\_high\_on\_coronoid\_region\_ extends\_to\_lower\_border\_of\_dentary;  
 {28 (29)\_Dentary\_coronoid\_process\_height below\_middle\_of\_orbit\_ above\_middle\_of\_orbit;  
 {29 (30)\_Position\_of\_dentary-surangular\_dorsal\_contact\_relative\_to\_postorbital\_bar\_and\_jaw\_joint closer\_to\_postorbital\_bar\_midway\_between\_ closer\_to\_jaw\_joint;  
 {30  
 {31)\_Postdentary\_rod\_height\_relative\_to\_exposed\_length\_(distance\_between\_base\_of\_reflected\_lamina\_and\_jaw\_j oint) greater\_than\_one-half\_length\_ about\_one-half\_length\_ less\_than\_one-half\_length;  
 {31 (32)\_Reflected\_lamina\_of-angular\_posterior\_extent\_relative\_to\_distance\_from\_angle\_of\_dentary\_to\_jaw\_joint greater\_than\_one-half\_the\_distance\_ less\_than\_one-half\_the\_distance;  
 {32 (33)\_Reflected\_lamina\_of-angular\_shape spoon-shaped\_plate\_ hook\_with\_depth\_greater\_than\_one-half\_length\_ \_hook\_with\_depth\_less\_than\_one-half\_length;  
 {33 (34)\_Upper\_incisor\_number five\_or\_more\_ four\_ three;  
 {34 (35)\_Lower\_incisor\_number four\_or\_more\_ three\_ two;  
 {35 (36)\_Incisor\_cutting\_margins smoothly\_ridged\_ serrated\_ denticulated;  
 {36 (37)\_Incisor\_size all\_small\_ some\_or\_all\_enlarged;  
 {37 (38)\_Upper\_canine\_size large\_ reduced\_in\_size\_ absent;  
 {38 (39)\_Lower\_canine\_size large\_ reduced\_in\_size\_ absent;  
 {39 (40)\_Canine\_serrations absent\_ present;  
 {40 (41)\_Upper\_postcanine\_buccal\_cingulum absent\_ present;  
 {41 (42)\_Postcanine\_lingual\_cingulum narrow\_ absent\_ lingually\_expanded;  
 {42 (43)\_Number\_of\_upper\_cusps\_in\_transverse\_row one\_ two\_ three\_or\_more;  
 {43 (44)\_Position\_of\_upper\_transverse\_cusp\_row\_on\_crown on\_anterior\_half\_of\_crown\_ from\_midcrown\_almost\_to\_posterior\_margin\_ at\_posterior\_margin\_(no\_posterior\_cingulum);  
 {44 (45)\_Central\_cusp\_of\_upper\_transverse\_row absent\_ about\_midway\_between\_buccal\_and\_lingual\_cusps\_ closer\_to\_lingual\_cusp;  
 {45 (46)\_Longitudinal\_shear\_surface\_of\_main\_upper\_buccal\_cusp anterior\_and\_posterior\_(to\_transverse\_ridge,\_if\_present)\_ posterior\_only\_ anterior\_only;  
 {46 (47)\_Upper\_anterobuccal\_accessory\_cusp present\_ absent;  
 {47 (48)\_Upper\_posterobuccal\_accessory\_cusp present\_ absent;  
 {48 (49)\_Upper\_anterolingual\_accessory\_cusp absent\_ present;  
 {49 (50)\_Upper\_anterior\_transverse\_(cingulum)\_ridge low\_ high;  
 {50 (51)\_Upper\_lingual\_ridge absent\_ present;  
 {51 (52)\_Transverse\_axis\_of\_crown\_strongly\_oblique\_to\_midline\_axis absent\_ present;  
 {52 (53)\_Number\_of\_lower\_cusps\_in\_transverse\_row one\_ two\_ three\_or\_more;

```

{53 (54)_Lower_anterior_cingulum_or_cusp present_ absent;
{54 (55)_Posterior_occlusal_basin_on_lower_postcanines absent_ present;
{55 (56)_Wider_lower_cusp_in_transverse_row lingual_(0)_ buccal;
{56 (57)_Posterior_portion_maxillary_tooth_row_inset_from_lateral_margin_of_maxilla_(cheek_developed)
absent_ moderately_set_in_ _well_set_in;
{57 (58)_Axis_of_posterior_part_of_maxillary_tooth_row directed_lateral_to_subtemporal_fossa_
directed_towards_center_of_fossa_ _directed_toward_medial_rim_of_fossa;
{58 (59)_Number_of_posterior_sectorial_postcanines six_or_more_ three_or_four_ _one_or_two_
none_(gomphodont);
{59 (60)_Postcanine_replacement_pattern_in_adult 'alternating'_
widely_spaced_waves_(three_or_more_teeth_per_wave)_ _single_wave;
{60 (61)_Expanded_costal_plates_on_ribs absent_ present;
{61 (62)_Lumbar_costal_plates_with_ridge_overlapping_preceding_rib absent_ present;
{62 (63)_Acromion_process absent_ present;
{63 (64)_Scapular_constriction_below_acromion absent_ present;
{64 (65)_Procoracoid_in_glenoid present_ barely_present_or_absent;
{65 (66)_Procoracoid_contact_with_scapula greater_than_coracoid_contact_
equal_to_or_less_than_coracoid_contact;
{66 (67)_Manual_digit_III_phalanx_number four_ three;
{67 (68)_Manual_digit_IV_phalanx_number four_ three;
{68 (69)_Length_of_anterior_process_of_iliun_anterior_to_acetabulum_(relative_to_diameter_of_acetabulum)
between_1.0_and_1.5_ greater_than_1.5;
{69 (70)_Length_of_posterior_process_of_iliun_posterior_to_acetabulum_(relative_to_diameter_of_acetabulum)
between_0.5_and_1.0_ greater_than_1.0_ _less_than_0.5;
{70 (71)_Dorsal_profile_of_iliun strongly_convex_ flat_to_concave;
{71 (72)_Total_length_of_pubis_relative_to_acetabulum_diameter Between_1.5_and_1.0_ less_than_1.0;
{72 (73)_Greater_trochanter_separated_from_femoral_head_by_distinct_notch absent_ present;
{73 (74)_Lesser_trochanter_position on_ventromedial_surface_of_femoral_shaft_
on_medial_surface_of_femoral_shaft;
{74 (75)_Vertebral_centra amphicoelous_ platycoelous;
;

proc /;
comments 0
;

```

**5.3 Result of the cladistic analysis conducted on Sidor and Hopson's (2018) data matrix (unconstrained search; six MPTs of 208 steps, CI 0.4904, RI 0.709).**

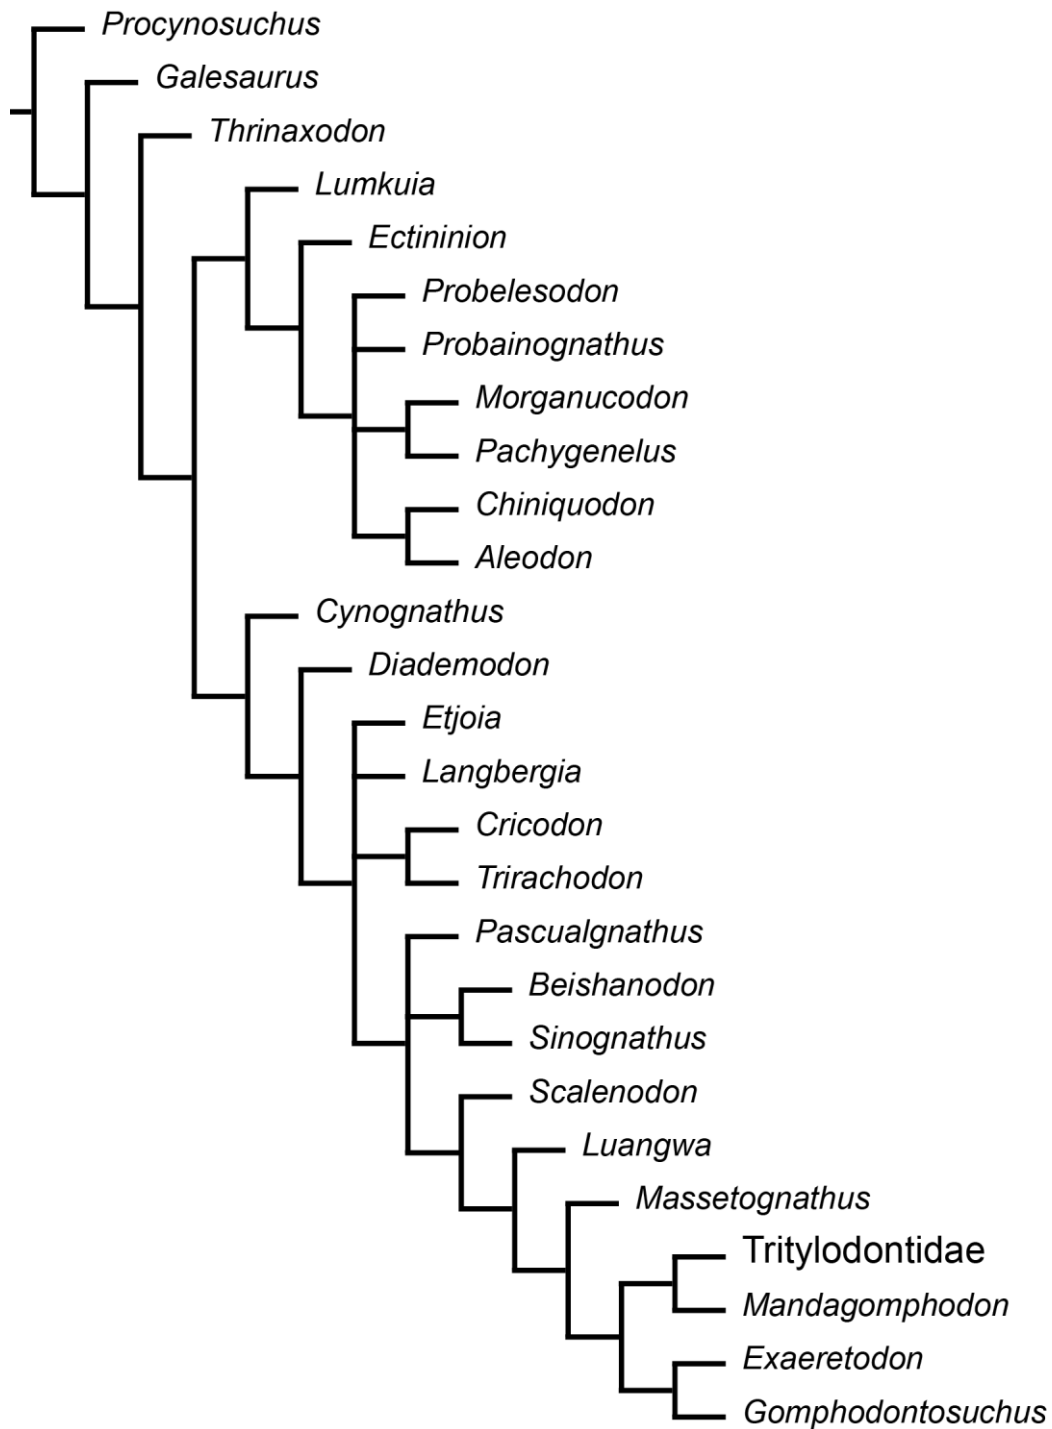

## 6. Skull length, body length, and body mass in basal cynodonts

| Taxon                 | Specimen  | Skull length | Body length | Skull/body length | Source                                                                 | Remarks                                                          |
|-----------------------|-----------|--------------|-------------|-------------------|------------------------------------------------------------------------|------------------------------------------------------------------|
| <i>Thrinaxodon</i>    | Composite | NA           | NA          | 0.17              | Jenkins (1971): first figure                                           |                                                                  |
| <i>Thrinaxodon</i>    | BP/1/7199 | 75           | NA          | 0.176-0.178       | Fernandez <i>et al.</i> (2013): figure 2A-B; Jasinoski & Abdala (2017) |                                                                  |
| <i>Diademodon</i>     | SAM K5278 | 113          | 535         | 0.2112            | Gow & Grine (1979)                                                     | <i>Diademodon</i> 's tail is too short in Brink (1955): figure 7 |
| <i>Massetognathus</i> | Composite | NA           | NA          | 0.1916            | Jenkins (1970): figure 9                                               |                                                                  |

Table A1. Data on skull length, body length and skull/body length ratio in basal cynodonts and gomphodonts. Skull and body length in mm.

Mancuso *et al.*'s (2014) formula for cynodont body mass (skull length in mm) is the following:

$$\log(\text{body mass}) = 3.13 * \log(\text{skull length}) - 5.59$$

| Taxon                           | Specimen                     | Skull length | Body mass | Source (skull length)                                                                              |
|---------------------------------|------------------------------|--------------|-----------|----------------------------------------------------------------------------------------------------|
| <i>Etjoia dentitransitus</i>    | GSN F1591                    | 88.5         | 3.19      | Pers. measurements                                                                                 |
| <i>Diademodon tetragonus</i>    | BP/1/2522                    | 293          | 135.3     | (Brink 1963)                                                                                       |
| <i>Titanogomphodon crassus</i>  | GSN R322                     | 430          | 449.53    | (Keyser 1973)                                                                                      |
| <i>Langbergia modisei</i>       | NMQR 3255;<br>BP/1/5362      | 113          | 6.86      | (Abdala <i>et al.</i> 2006)                                                                        |
| <i>Trirachodon berryi</i>       | BP/1/4658                    | 102.7        | 5.08      | Pers. measurements                                                                                 |
| <i>Cricodon metabolus</i>       | BP/1/5540                    | 160          | 20.36     | (Abdala <i>et al.</i> 2005)                                                                        |
| <i>Cricodon metabolus</i>       | NA                           | 180          | 29.44     | (Sidor & Hopson 2018)                                                                              |
| <i>Sinognathus gracilis</i>     | IVPP V2339                   | 113          | 6.86      | ImageJ based on photo of cranium                                                                   |
| <i>Beishanodon youngi</i>       | PKUP V3007                   | 270          | 104.7     | (Gao <i>et al.</i> 2010)                                                                           |
| <i>Traversodontidae</i> indet.  | CGS JSM 100                  | 41.66        | 0.302     | Pers. measurements                                                                                 |
| <i>Pascualgnathus polanskii</i> | PVL 4416                     | 124.22       | 9.22      | Pers. measurements; 100-120 mm according to Martinelli (2010)                                      |
| <i>Andescynodon mendozensis</i> | PVL 3900                     | 137          | 12.53     | (Liu & Powell 2009)                                                                                |
| <i>Scalenodon angustifrons</i>  | UMCZ T907<br>(Specimen 119B) | 190          | 34.88     | Estimation based on upper postcanine width vs. skull length of UMCZ T907 (Specimen 120B; holotype) |
| <i>Luangwa drysdalli</i>        | BP/1/3731                    | 142          | 14.017    | Pers. measurements; 136 mm according to Abdala and Sa-Teixeira (2004)                              |
| <i>Luangwa sudamericana</i>     | UFRGS-PV 267                 | 94           | 3.85      | (Abdala & Sa-Teixeira 2004)                                                                        |
| <i>Luangwa</i> sp.              | CGS R 572                    | 204          | 43.56     | (Abdala & Smith 2009)                                                                              |
| <i>Traversodon stahleckeri</i>  | UFRGS-PV<br>0224T            | 240          | 72.45     | (Barberena 1981)                                                                                   |

Table A2. Data on maximum skull length (in mm) and body mass (in kg) in basal gomphodonts. Estimations of body mass based on Mancuso *et al.*'s (2014) formula for cynodont (see above).

7. Coronal section through the skull of *Etjoia dentitransitus* (GSN F1591) at the level of the main crack

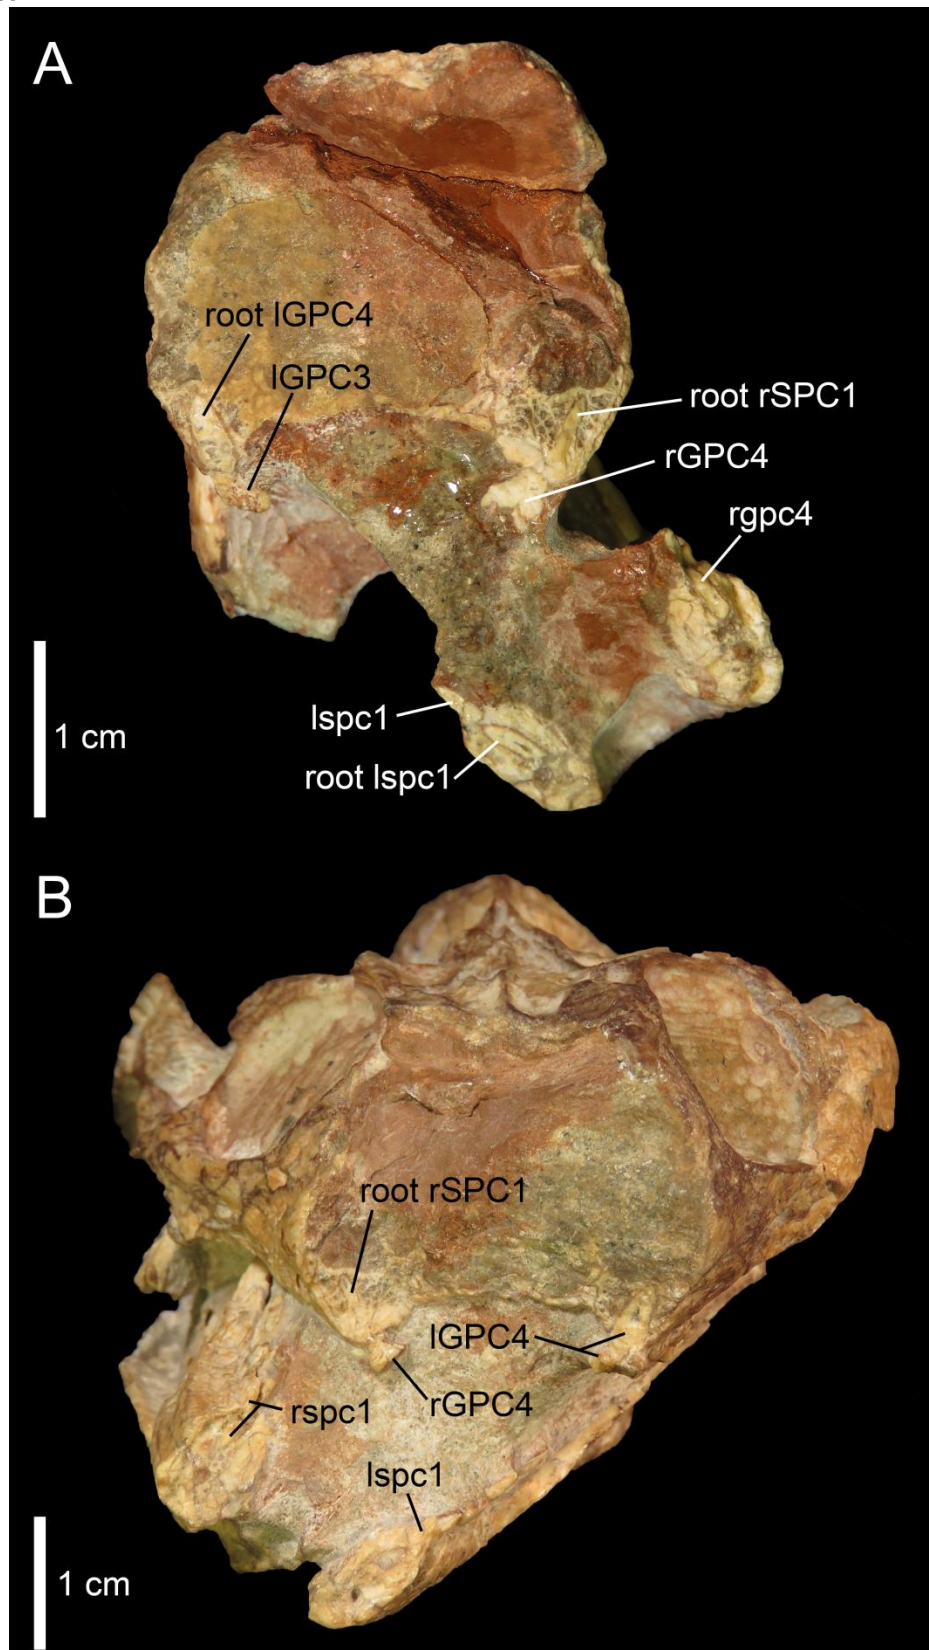

Figure A3. Coronal section of the skull of *Etjoia dentitransitus* (GSN F1591) at the level of the last upper gomphodont and first lower sectorial postcanines. **A**, anterior and; **B**, posterior portions of cranium and mandible in **A**, posterior, and **B**, anterior views. Abbreviations: lGPC, left upper gomphodont postcanine; lspc, left lower sectorial postcanine; rgpc, right lower gomphodont postcanine; rGPC, right upper gomphodont postcanine; rspc, right lower sectorial postcanine; rSPC, right upper sectorial postcanine.

## 8. CT-scan imagery of *Etjoia dentitransitus* (GSN F1591)

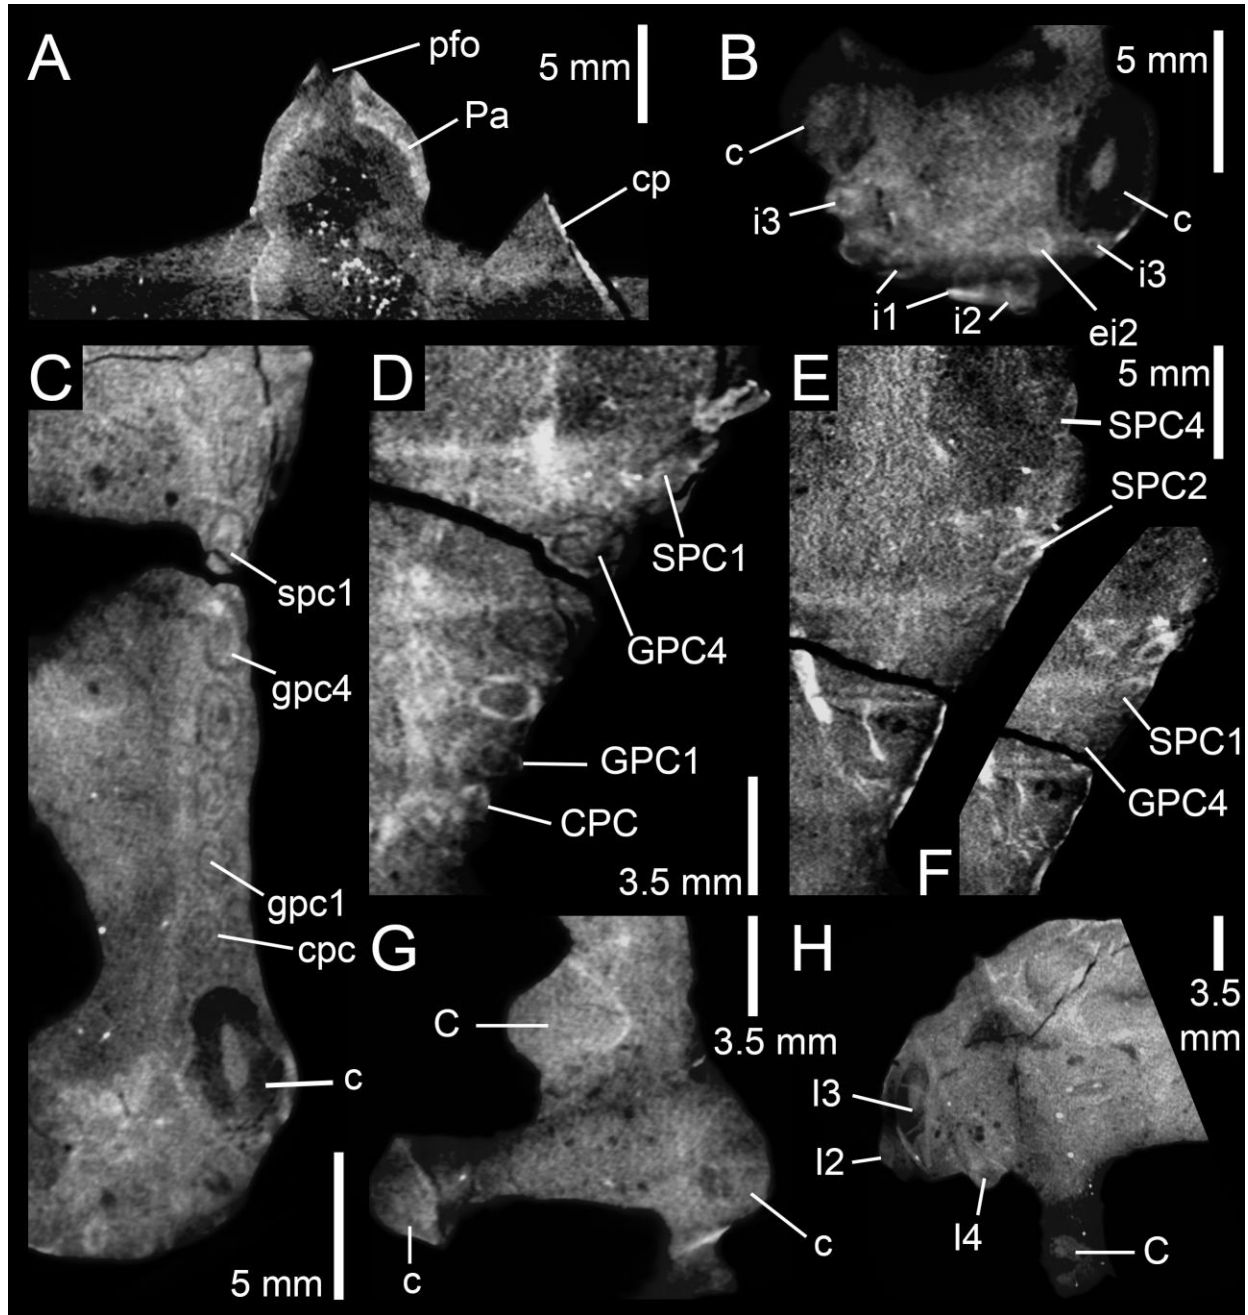

Figure A1. Internal morphology and  $\mu$ CT virtual sections of the skull of *Etjoia dentitransitus* (GSN F1591) derived from CT-scan data. **A**, Coronal section through the parietal foramen; **B**, transverse section through the lower incisors and canines; **C**, transverse section through the right mandibular dentition; **D-F**, transverse section through the right upper postcanine dentition at the level of **D**, the crowns of the gomphodont postcanines; **E**, the crowns of the last two sectorial postcanines, and **F**, the crowns of the first two sectorial postcanines; **G**, transverse section through the upper right and lower canines; **H**, sagittal section through the upper incisors and

canine. Abbreviations: c, lower canine; C, upper canine; cp, coronoid process; cpc, lower conical postcanine; CPC, upper conical postcanine; gpc, lower gomphodont postcanine; GPC, upper gomphodont postcanine; i, lower incisor; I, upper incisor; Pa, parietal; pfo, parietal foramen.

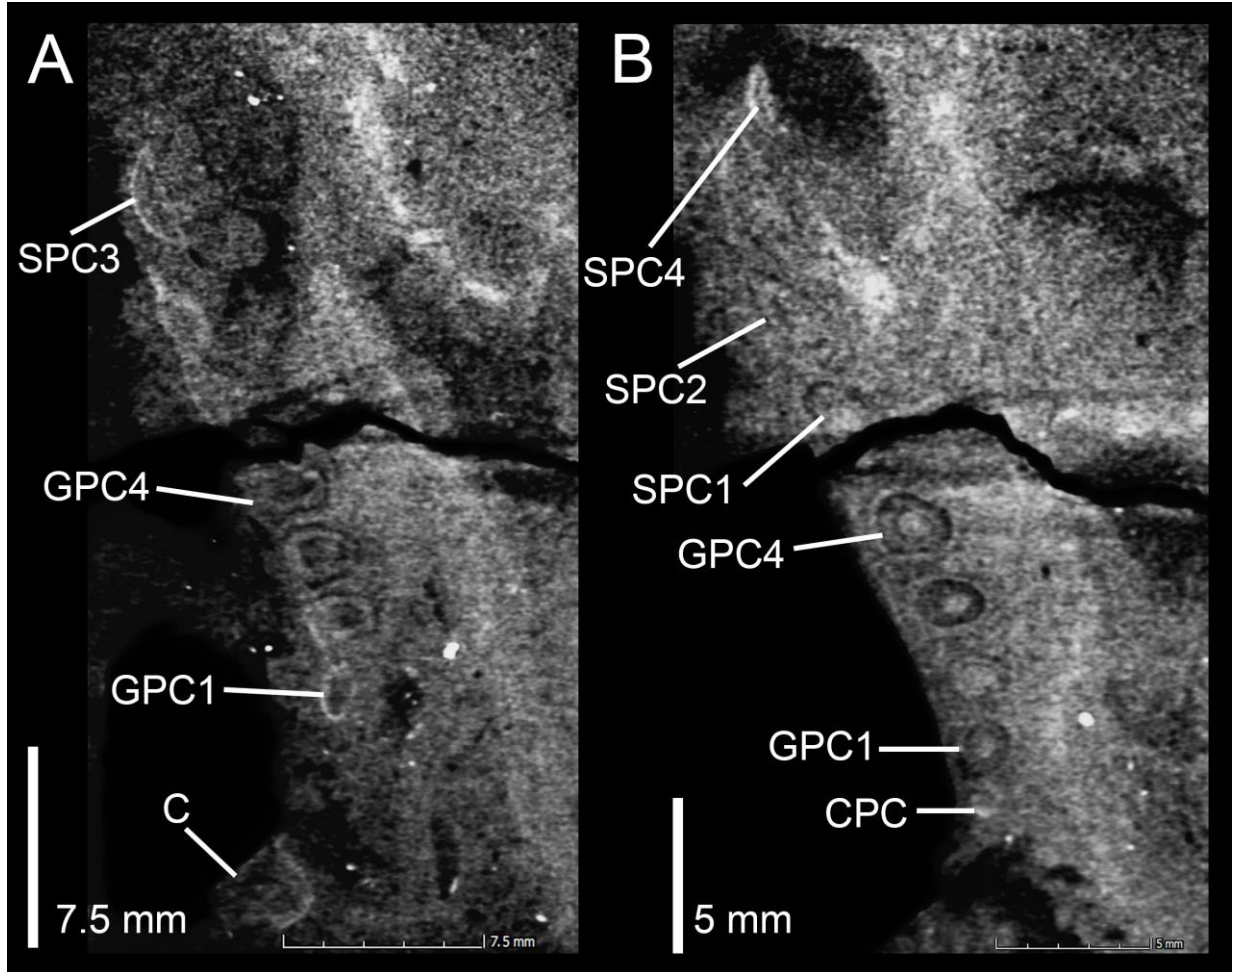

Figure A2. Internal morphology and  $\mu$ CT virtual sections of the upper jaw of *Etjoia dentitransitus* (GSN F1591) derived from CT-scan data. Transverse section through the left canine and postcanine tooth row at the level of **A**, the crowns; and **B**, the roots of the gomphodont teeth. Abbreviations: C, upper canine; CPC, upper conical postcanine; GPC, upper gomphodont postcanine; SPC, upper sectorial postcanine.

## Bibliography of the appendix

- Abdala, F. & Sa-Teixeira, A. M.** 2004. A traversodontid cynodont of African affinity in the South American Triassic. *Palaeontologia Africana*, **40**, 11–22.
- Abdala, F. & Smith, R. M. H.** 2009. A Middle Triassic cynodont fauna from Namibia and its implications for the biogeography of Gondwana. *Journal of Vertebrate Paleontology*, **29**, 837–851, doi: 10.1671/039.029.0303.
- Abdala, F., Hancox, P. J. & Neveling, J.** 2005. Cynodonts from the uppermost Burgersdorp Formation, South Africa, and their bearing on the biostratigraphy and correlation of the Triassic *Cynognathus* Assemblage Zone. *Journal of Vertebrate Paleontology*, **25**, 192–199, doi: 10.1671/0272-4634(2005)025[0192:CFTUBF]2.0.CO;2.
- Abdala, F., Neveling, J. & Welman, J.** 2006. A new trirachodontid cynodont from the lower levels of the Burgersdorp Formation (Lower Triassic) of the Beaufort Group, South Africa and the cladistic relationships of Gondwanan gomphodonts. *Zoological Journal of the Linnean Society*, **147**, 383–413, doi: 10.1111/j.1096-3642.2006.00224.x.
- Abdala, F., Jasinowski, S. C. & Fernandez, V.** 2013. Ontogeny of the Early Triassic cynodont *Thrinaxodon liorhinus* (Therapsida): dental morphology and replacement. *Journal of Vertebrate Paleontology*, **33**, 1408–1431, doi: 10.1080/02724634.2013.775140.
- Barberena, M. C.** 1981. Uma nova espécie de *Massetognathus* (*Massetognathus ochagaviae*, sp. nov.) da Formação Santa Maria, Triássico do Rio Grande do Sul. *Pesquisas*, **14**, 181–195.
- Brink, A. S.** 1955. A study on the skeleton of *Diademodon*. *Palaeontologia Africana*, **3**, 3–39.
- Brink, A. S.** 1963. Two cynodonts from the Ntawere formation in the Luangwa valley of Northern Rhodesia. *Palaeontologia Africana*, **8**, 77–96.
- Fernandez, V., Abdala, F., Carlson, K. J., Cook, D. C., Rubidge, B. S., Yates, A. & Tafforeau, P.** 2013. Synchrotron reveals Early Triassic odd couple: injured amphibian and aestivating therapsid share burrow. *PLOS ONE*, **8**, e64978, doi: 10.1371/journal.pone.0064978.
- Gaetano, L. C. & Abdala, F.** 2015. The stapes of gomphodont cynodonts: insights into the middle ear structure of non-mammaliaform cynodonts. *PLOS ONE*, **10**, e0131174, doi: 10.1371/journal.pone.0131174.
- Gao, K.-Q., Fox, R. C., Zhou, C.-F. & Li, D.-Q.** 2010. A new nonmammalian eucynodont (Synapsida: Therapsida) from the Triassic of Northern Gansu Province, China, and its biostratigraphic and biogeographic implications. *American Museum Novitates*, **3685**, 1–25, doi: 10.1206/649.1.
- Gow, C. E. & Grine, F. E.** 1979. An articulated skeleton of a small individual of *Diademodon* (Therapsida; Cynodontia). *Palaeontologia Africana*, **22**, 29–34.

- Hopson, J. A.** 2005. A juvenile gomphodont cynodont specimen from the *Cynognathus* Assemblage Zone of South Africa: implications for the origin of gomphodont postcanine morphology. *Palaeontologia Africana*, **41**, 53–66.
- Hopson, J. A.** 2014. The traversodontid cynodont *Mandagomphodon hirschsoni* from the Middle Triassic of the Ruhuhu Valley, Tanzania. In: Kammerer, C. F., Angielczyk, K. D. & Fröbisch, J. (eds) *Early Evolutionary History of the Synapsida*. Springer, Vertebrate Paleobiology and Paleoanthropology, 233–253.
- Jasinoski, S. C. & Abdala, F.** 2017. Aggregations and parental care in the Early Triassic basal cynodonts *Galesaurus planiceps* and *Thrinaxodon liorhinus*. *PeerJ*, **5**, e2875, doi: 10.7717/peerj.2875.
- Jasinoski, S. C., Abdala, F. & Fernandez, V.** 2015. Ontogeny of the Early Triassic cynodont *Thrinaxodon liorhinus* (Therapsida): cranial morphology. *The Anatomical Record*, **298**, 1440–1464, doi: 10.1002/ar.23116.
- Jenkins, F. A. Jr.** 1970. The Chañares (Argentina) Triassic reptile fauna VII. The postcranial skeleton of the traversodontid *Massetognathus pascuali* (Therapsida, Cynodontia). *Breviora*, **352**, 1–28.
- Jenkins, F. A. Jr.** 1971. The postcranial skeleton of African cynodonts. *Bulletin of the Peabody Museum of Natural History*, **36**, 1–216.
- Kammerer, C. F., Flynn, J. J., Ranivoharimanana, L. & Wyss, A. R.** 2012. Ontogeny in the Malagasy traversodontid *Dadadon isaloi* and a reconsideration of its phylogenetic relationships. *Fieldiana Life and Earth Sciences*, **5**, 112–125, doi: 10.3158/2158-5520-5.1.112.
- Keyser, A. W.** 1973. A new Triassic vertebrate fauna from South West Africa. *Palaeontologia Africana*, **16**, 1–15.
- Liu, J. & Powell, J.** 2009. Osteology of *Andescynodon* (Cynodontia: Traversodontidae) from the Middle Triassic of Argentina. *American Museum Novitates*, **3674**, 1–19, doi: 10.1206/606.1.
- Liu, J. & Sues, H.-D.** 2010. Dentition and tooth replacement of *Boreogomphodon* (Cynodontia: Traversodontidae) from the Upper Triassic of North Carolina, USA. *Vertebrata Palasiatica*, **48**, 169–184.
- Martinelli, A. G.** 2010. On the postcanine dentition of *Pascualgnathus polanskii* Bonaparte (Cynodontia, Traversodontidae) from the Middle Triassic of Argentina. *Geobios*, **43**, 629–638, doi: 10.1016/j.geobios.2010.03.006.
- Melo, T. P., Abdala, F. & Soares, M. B.** 2015. The Malagasy cynodont *Menadon besairiei* (Cynodontia; Traversodontidae) in the Middle–Upper Triassic of Brazil. *Journal of Vertebrate Paleontology*, **35**, e1002562, doi: 10.1080/02724634.2014.1002562.

- Melo, T. P., Martinelli, A. G. & Soares, M. B.** 2017. A new gomphodont cynodont (Traversodontidae) from the Middle–Late Triassic *Dinodontosaurus* Assemblage Zone of the Santa Maria Supersequence, Brazil. *Palaeontology*, **60**, 571–582, doi: 10.1111/pala.12302.
- Miron, L. R., Pavanatto, A. E. B., Pretto, F. A., Müller, R. T., Dias-da-Silva, S. & Kerber, L.** 2020. *Siriusgnathus niemeyerorum* (Eucynodontia: Gomphodontia): The youngest South American traversodontid? *Journal of South American Earth Sciences*, **97**, 102394, doi: 10.1016/j.jsames.2019.102394.
- Pavanatto, A. E. B., Pretto, F. A., Kerber, L., Müller, R. T., Da-Rosa, Á. A. S. & Dias-da-Silva, S.** 2018. A new Upper Triassic cynodont-bearing fossiliferous site from southern Brazil, with taphonomic remarks and description of a new traversodontid taxon. *Journal of South American Earth Sciences*, **88**, 179–196, doi: 10.1016/j.jsames.2018.08.016.
- Ranivoharimanana, L., Kammerer, C. F., Flynn, J. J. & Wyss, A. R.** 2011. New material of *Dadadon isaloi* (Cynodontia, Traversodontidae) from the Triassic of Madagascar. *Journal of Vertebrate Paleontology*, **31**, 1292–1302, doi: 10.1080/039.031.0619.
- Ray, S.** 2015. A new Late Triassic traversodontid cynodont (Therapsida, Eucynodontia) from India. *Journal of Vertebrate Paleontology*, **35**, e930472, doi: 10.1080/02724634.2014.930472.
- Sidor, C. A. & Hopson, J. A.** 2018. *Cricodon metabolus* (Cynodontia: Gomphodontia) from the Triassic Ntawere Formation of northeastern Zambia: patterns of tooth replacement and a systematic review of the Trirachodontidae. In: Sidor, C. A. & Nesbitt, S. J. (eds) *Vertebrate and Climatic Evolution in the Triassic Rift Basins of Tanzania and Zambia*. Society of Vertebrate Paleontology Memoir 17. *Journal of Vertebrate Paleontology* 37(6, Supplement), 39–64.
- Sues, H.-D. & Hopson, J. A.** 2010. Anatomy and phylogenetic relationships of *Boreogomphodon jeffersoni* (Cynodontia: Gomphodontia) from the Upper Triassic of Virginia. *Journal of Vertebrate Paleontology*, **30**, 1202–1220, doi: 10.1080/02724634.2010.483545.
- Sues, H.-D., Olsen, P. E. & Carter, J. G.** 1999. A Late Triassic traversodont cynodont from the Newark Supergroup of North Carolina. *Journal of Vertebrate Paleontology*, **19**, 351–354, doi: 10.1080/02724634.1999.10011146.
